# Supplementary material for: General solvent-free highly selective N-tert-butyloxycarbonylation strategy using protic ionic liquid as an efficient catalyst
Source: Royal Society of Chemistry journal article supplement (doi:10.1039/c4ra02670e), 2014-01-01

## General solvent-free highly selective *N*-*tert*-butyloxycarbonylation strategy using protic ionic liquid as an efficient catalyst

Swapan Majumdar<sup>a\*</sup>, Jhinuk De<sup>a</sup>, Ankita Chakraborty<sup>a</sup> and Dilip K. Maiti<sup>b</sup>

<sup>a</sup>Department of Chemistry, Tripura University, Suryamaninagar, 799 022, INDIA,  
E-mail: [smajumdar@tripurauniv.in](mailto:smajumdar@tripurauniv.in); Tel: +91-381-237-9070; Fax: +91-381-2374802;

<sup>b</sup>Department of Chemistry, University of Calcutta, 92, A. P. C. Road, Kolkata 700 009, INDIA

**General procedure for *N*-*tert*-butyloxycarbonylation of amines:** A mixture of Boc<sub>2</sub>O (5.0 mmol), protic ionic liquid (5 mol%) and an amine (5.0 mmol) was stirred at room temperature or 70°C for the time indicated in Table 2. After completion of reaction as revealed by TLC, the mixture was diluted with water (5 ml) and extracted with ether or ethyl acetate (3 x 10 ml). The aqueous layer was recycled. The combined organic layer was washed with water, dried over anhydrous sodium sulphate and concentrated under reduced pressure. The crude products were essentially pure but for analytical data, the samples were passed through short pad silica-gel (60-120 mesh) to remove any trace impurities.

**3-(*N*-*tert*-butyloxy carbonyl)amino-1-propanol (5h):** Table 3, entry 8): Yield: 99%; colourless syrup; IR (neat) 3368, 2978, 1689, 1526 cm<sup>-1</sup>; <sup>1</sup>H NMR (CDCl<sub>3</sub>, 300 MHz) δ 4.97 (bs, 1H), 3.60 (bs, 2H), 3.41 (bs, 1H), 3.24-3.18 (m, 2H), 1.66 – 1.58 (m, 2H), 1.39 (s, 9H); <sup>13</sup>C NMR (CDCl<sub>3</sub>, 75 MHz) δ 157.1, 79.5, 59.2, 37.0, 32.7, 28.3; EIMS m/z 176 (M<sup>+</sup>+1), 175 (M<sup>+</sup>), 145, 120, 89, 76; HRMS Calcd for C<sub>8</sub>H<sub>17</sub>NO<sub>3</sub> 175.2263 found 175.2260

***Tert*-butyl-[3-(*N*-*tert*-butyloxy carbonyl)amino propyl] carbonate (5i):** Table 3, entry 9): Yield: 98%; colourless syrup; IR (neat) 3369, 2980, 2932, 1742, 1696, 1394, 1369 cm<sup>-1</sup>; <sup>1</sup>H NMR (CDCl<sub>3</sub>, 300 MHz) δ 4.76 (bs, 1H), 4.08 (t, *J* = 6.3 Hz, 2H); 3.20-3.14 (m, 2H); 1.87-1.76 (m, 2H), 1.44 (s, 9H), 1.40 (s, 9H); <sup>13</sup>C NMR (CDCl<sub>3</sub>, 75 MHz) δ 155.9, 153.6, 82.0, 79.2, 64.4, 37.2, 29.1, 28.8, 27.9; EIMS m/z 276 (M<sup>+</sup>+1), 275 (M<sup>+</sup>); 219, 204, 163, 102, 56; HRMS Calcd for C<sub>13</sub>H<sub>25</sub>NO<sub>5</sub> 275.3427 found 275.3422.

**N-tert-Butyloxycarbonyl L-Leucinol (6a:** Table 4, entry 1): yield: 97%, colourless syrup;  $[\alpha]_D^{25}$   $-28^\circ$  (c 2, MeOH) {lit  $[\alpha]_D^{20}$   $-27.5 \pm 1^\circ$  (c 2, MeOH), Fisher Scientific Ltd., Catalogue No. AC37620-0050}; IR (neat) 3367, 2928, 2873, 1690  $\text{cm}^{-1}$ ;  $^1\text{H}$  NMR ( $\text{CDCl}_3$ , 300 MHz)  $\delta$  4.71 (bs, 1H), 3.66-3.58 (m, 2H), 3.49-3.43 (m, 1H), 2.98 (bs, 1H), 1.68-1.56 (m, 1H), 1.41 (s, 9H), 1.31-1.19 (m, 2H), 0.90 (d,  $J = 5.7$  Hz, 6H);  $^{13}\text{C}$  NMR ( $\text{CDCl}_3$ , 75 MHz)  $\delta$  156.50, 79.50, 66.4, 51.1, 40.5, 28.3, 24.7, 23.0; EI MS  $m/z$  218 ( $\text{M}^+ + 1$ ), 186, 162, 144, 130, 86.

### $^1\text{H}$ NMR spectra of 4a

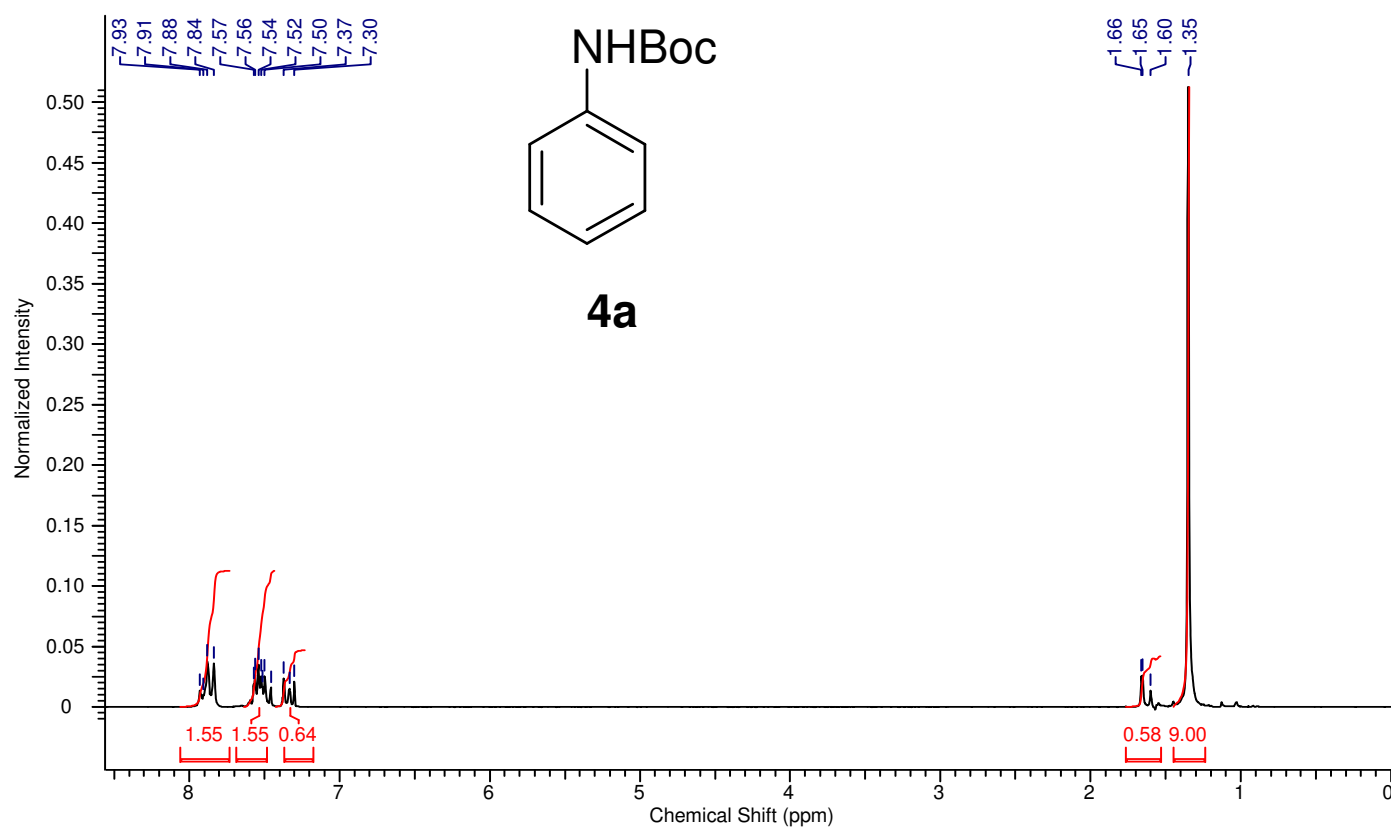

# <sup>1</sup>H NMR spectra of 4b

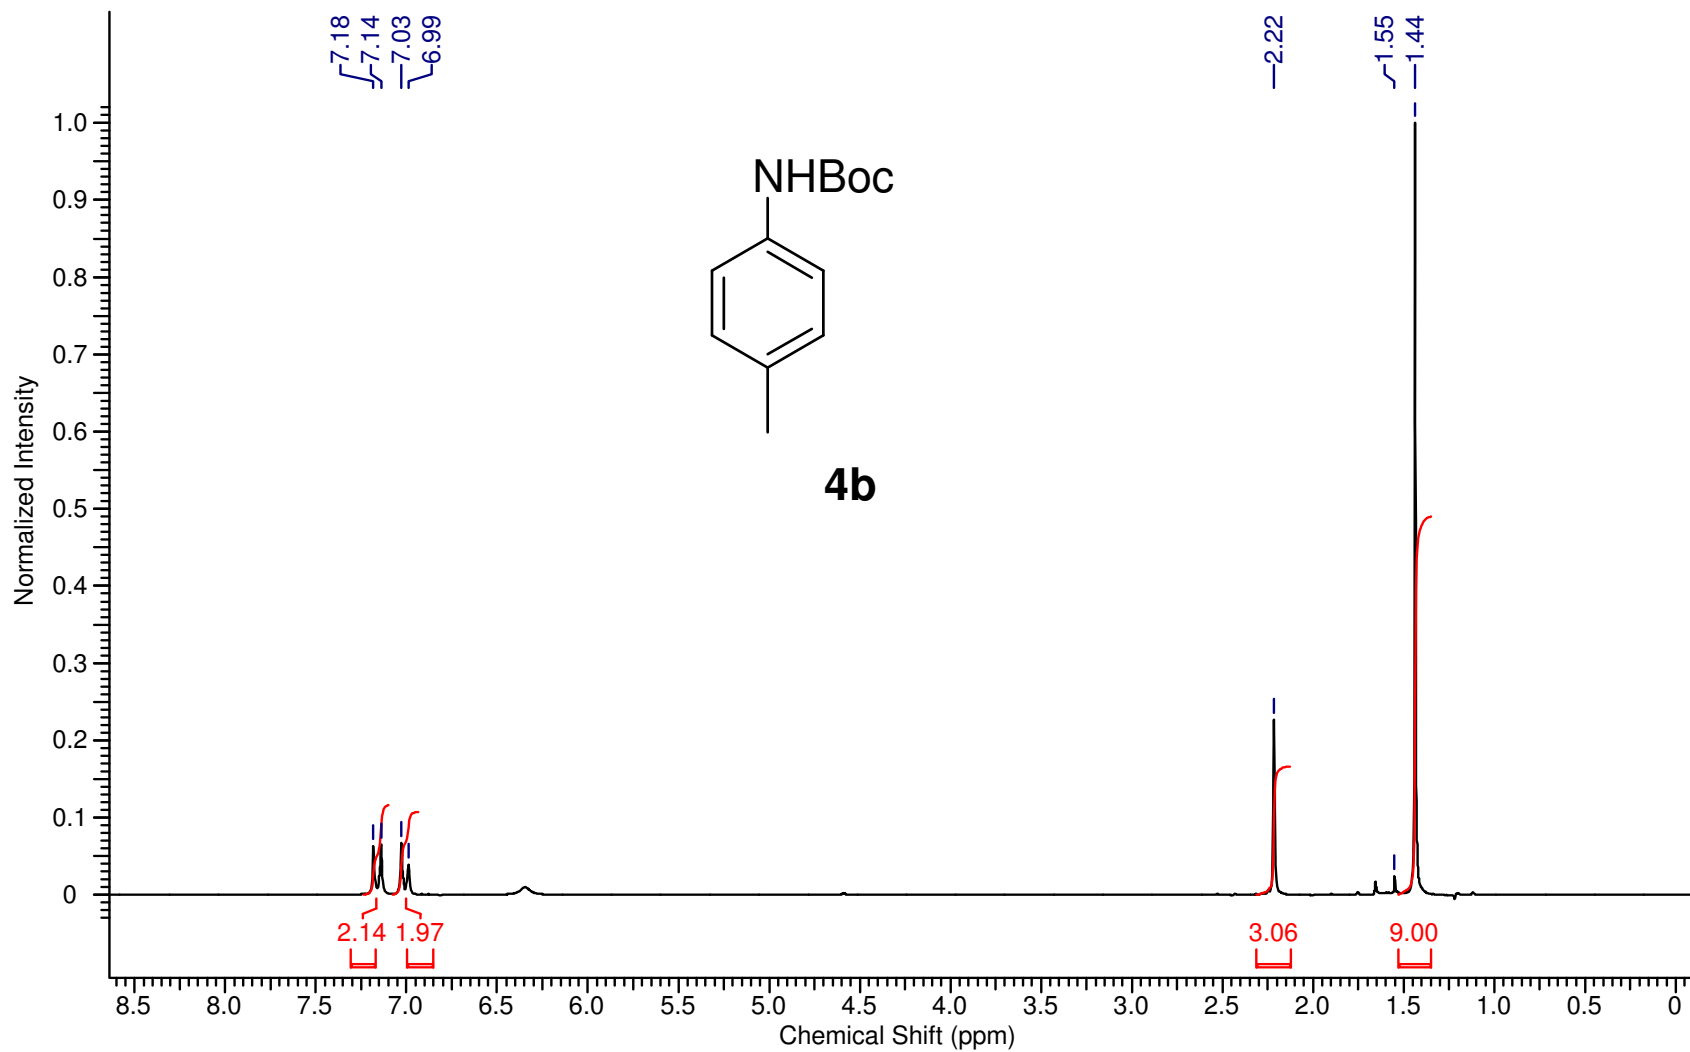

# <sup>1</sup>H NMR spectra of 4d

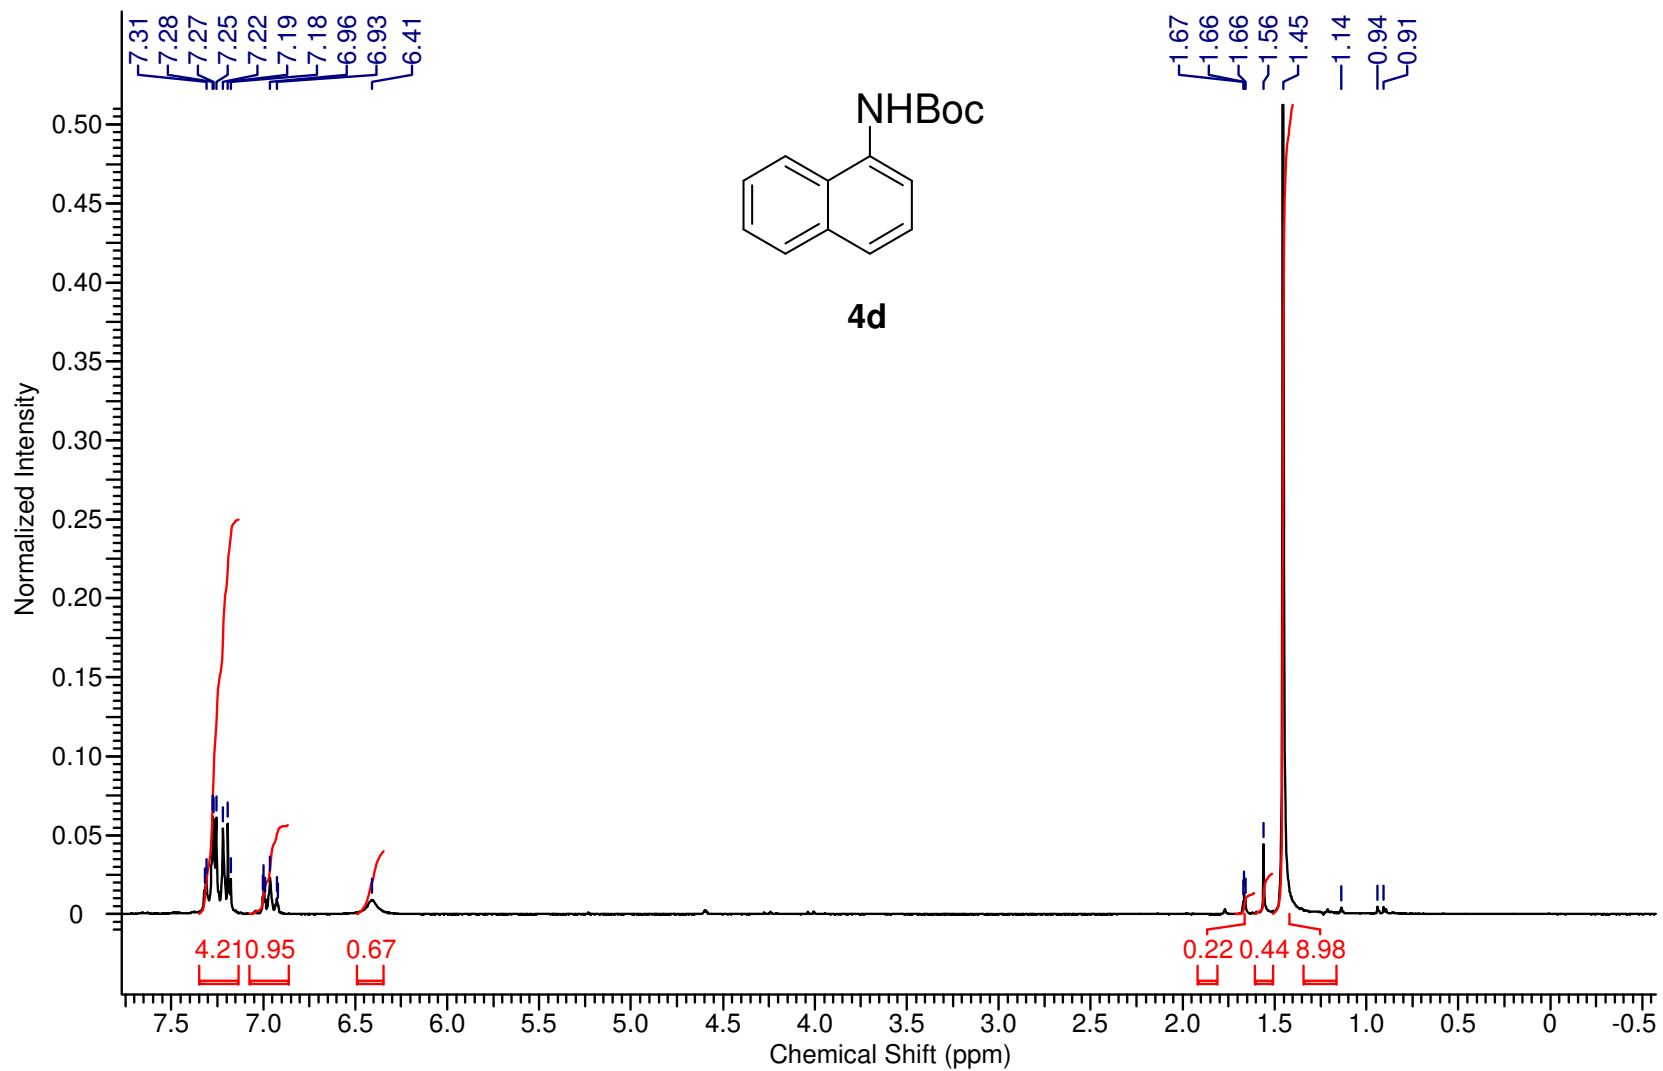

# <sup>13</sup>C NMR spectra of 4d

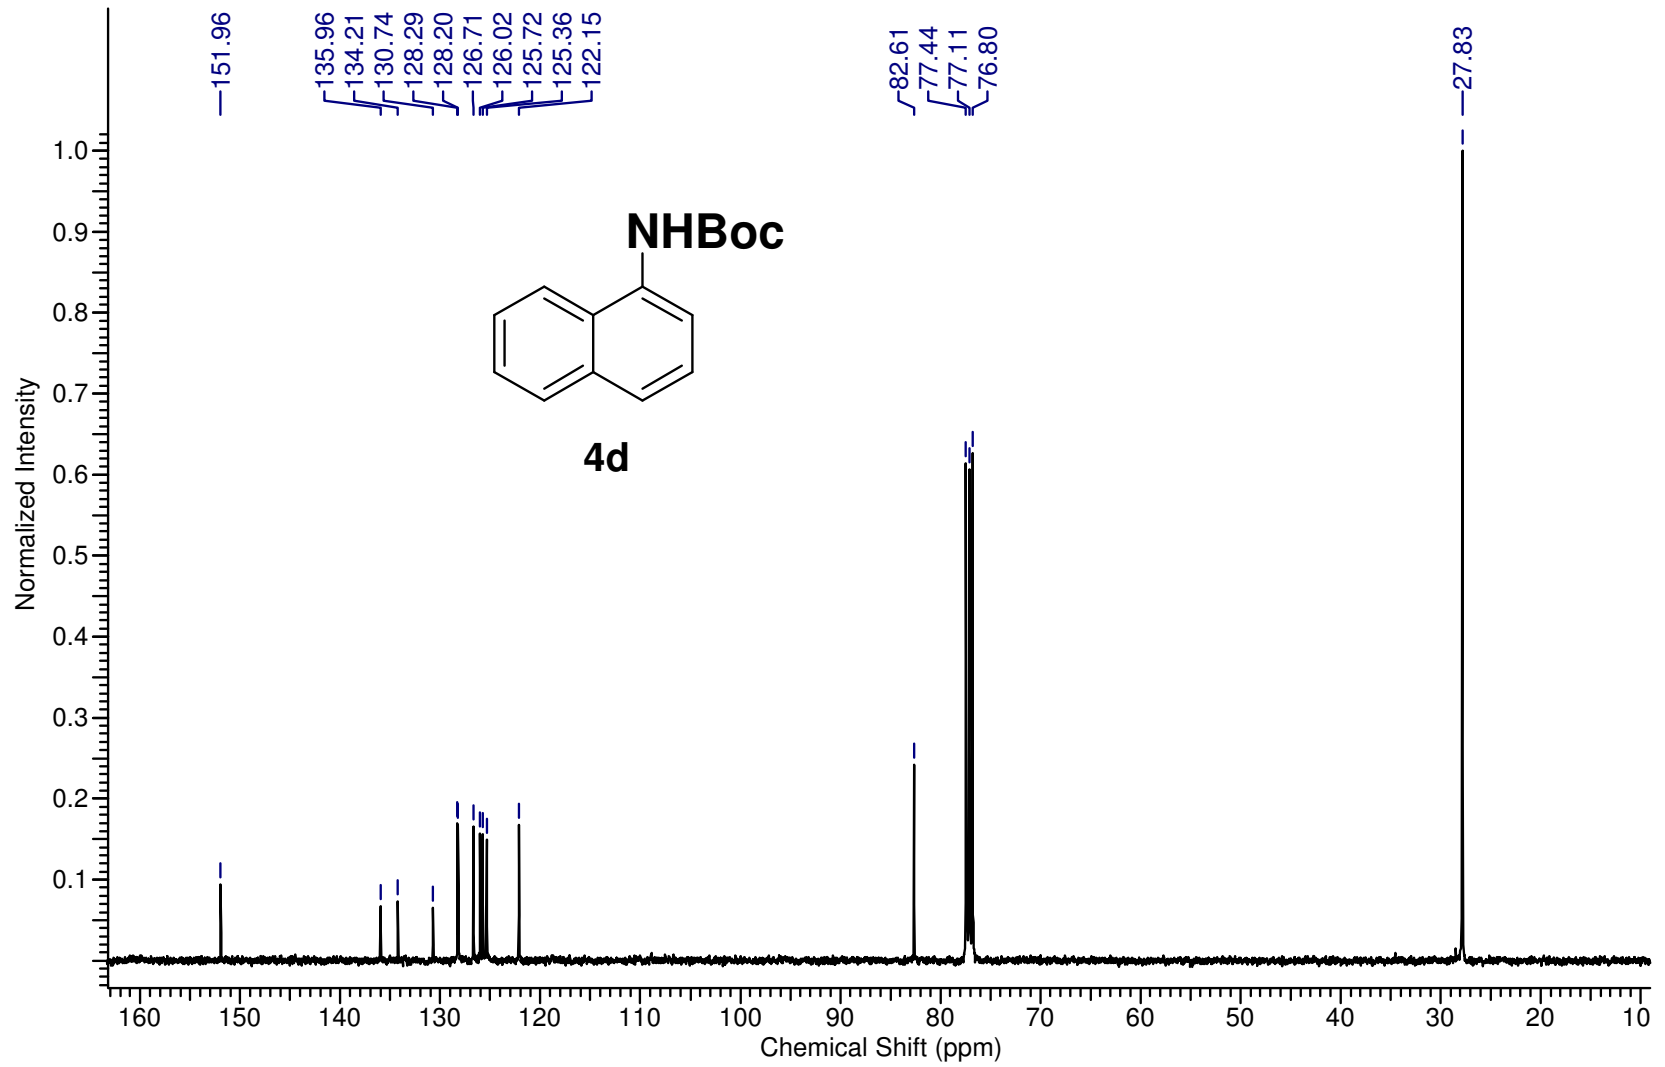

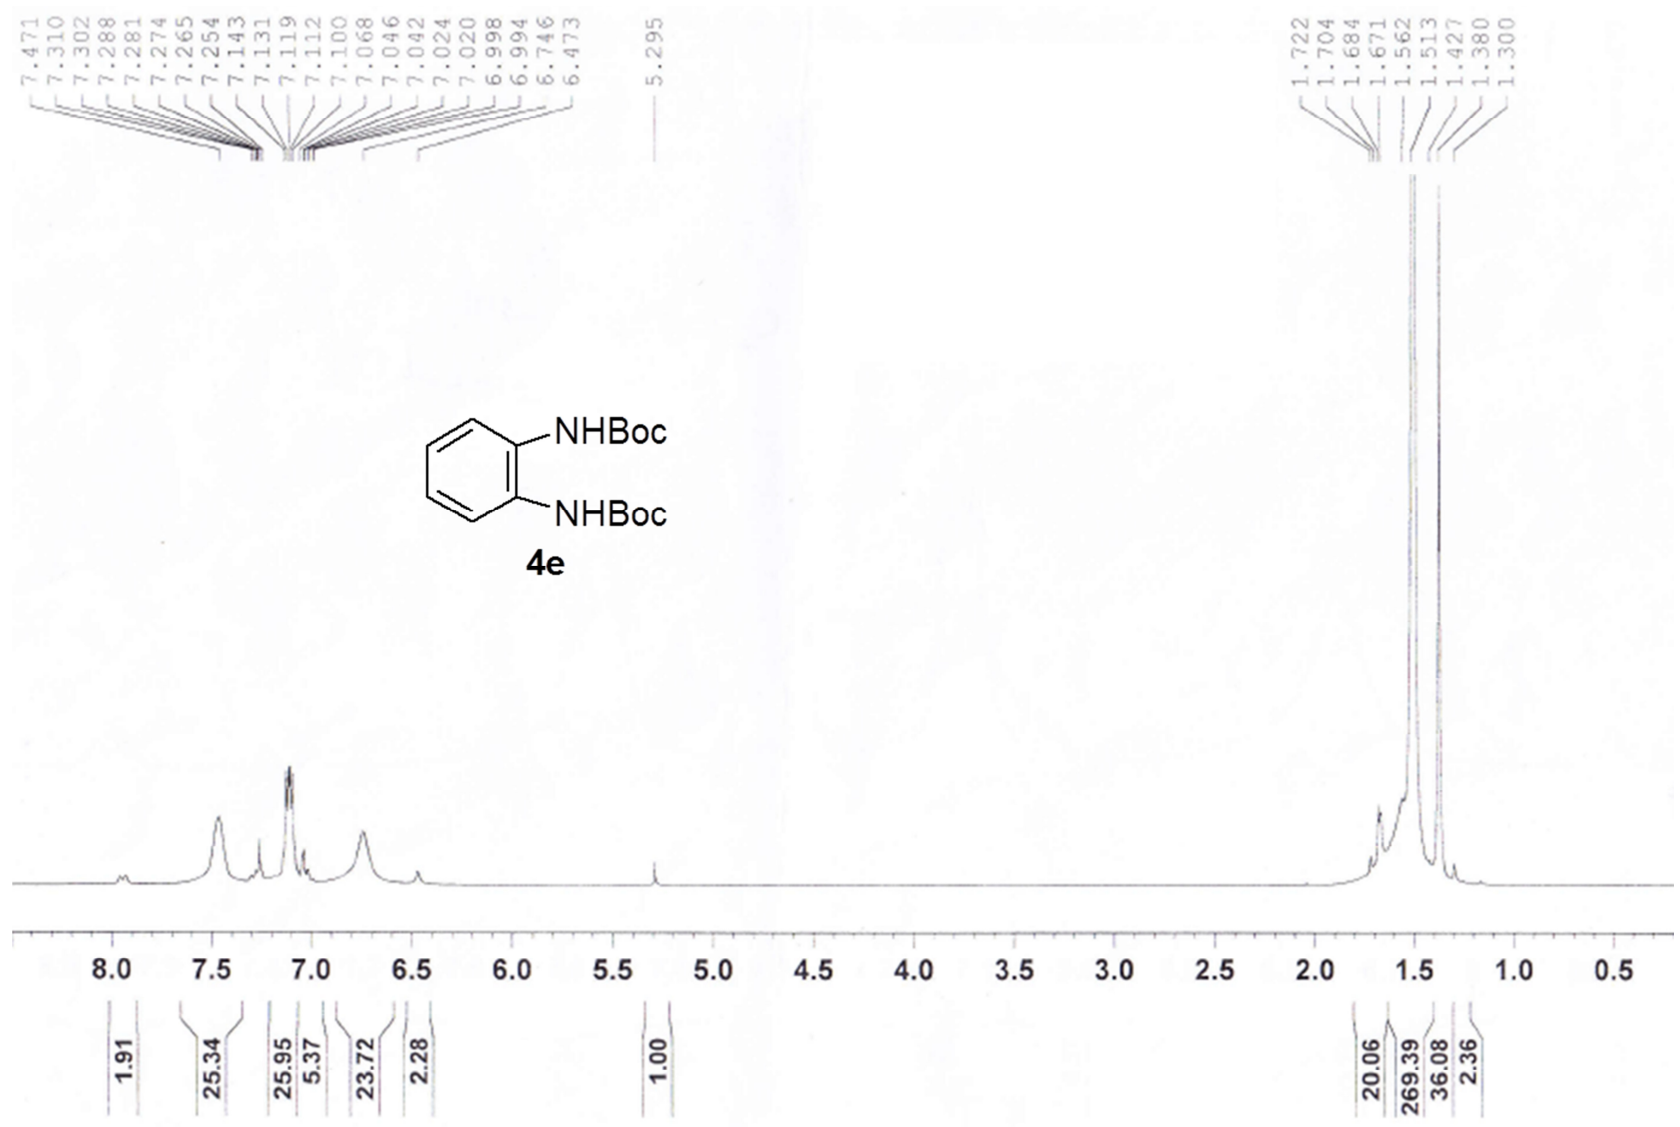

# <sup>1</sup>H NMR spectra of 4h

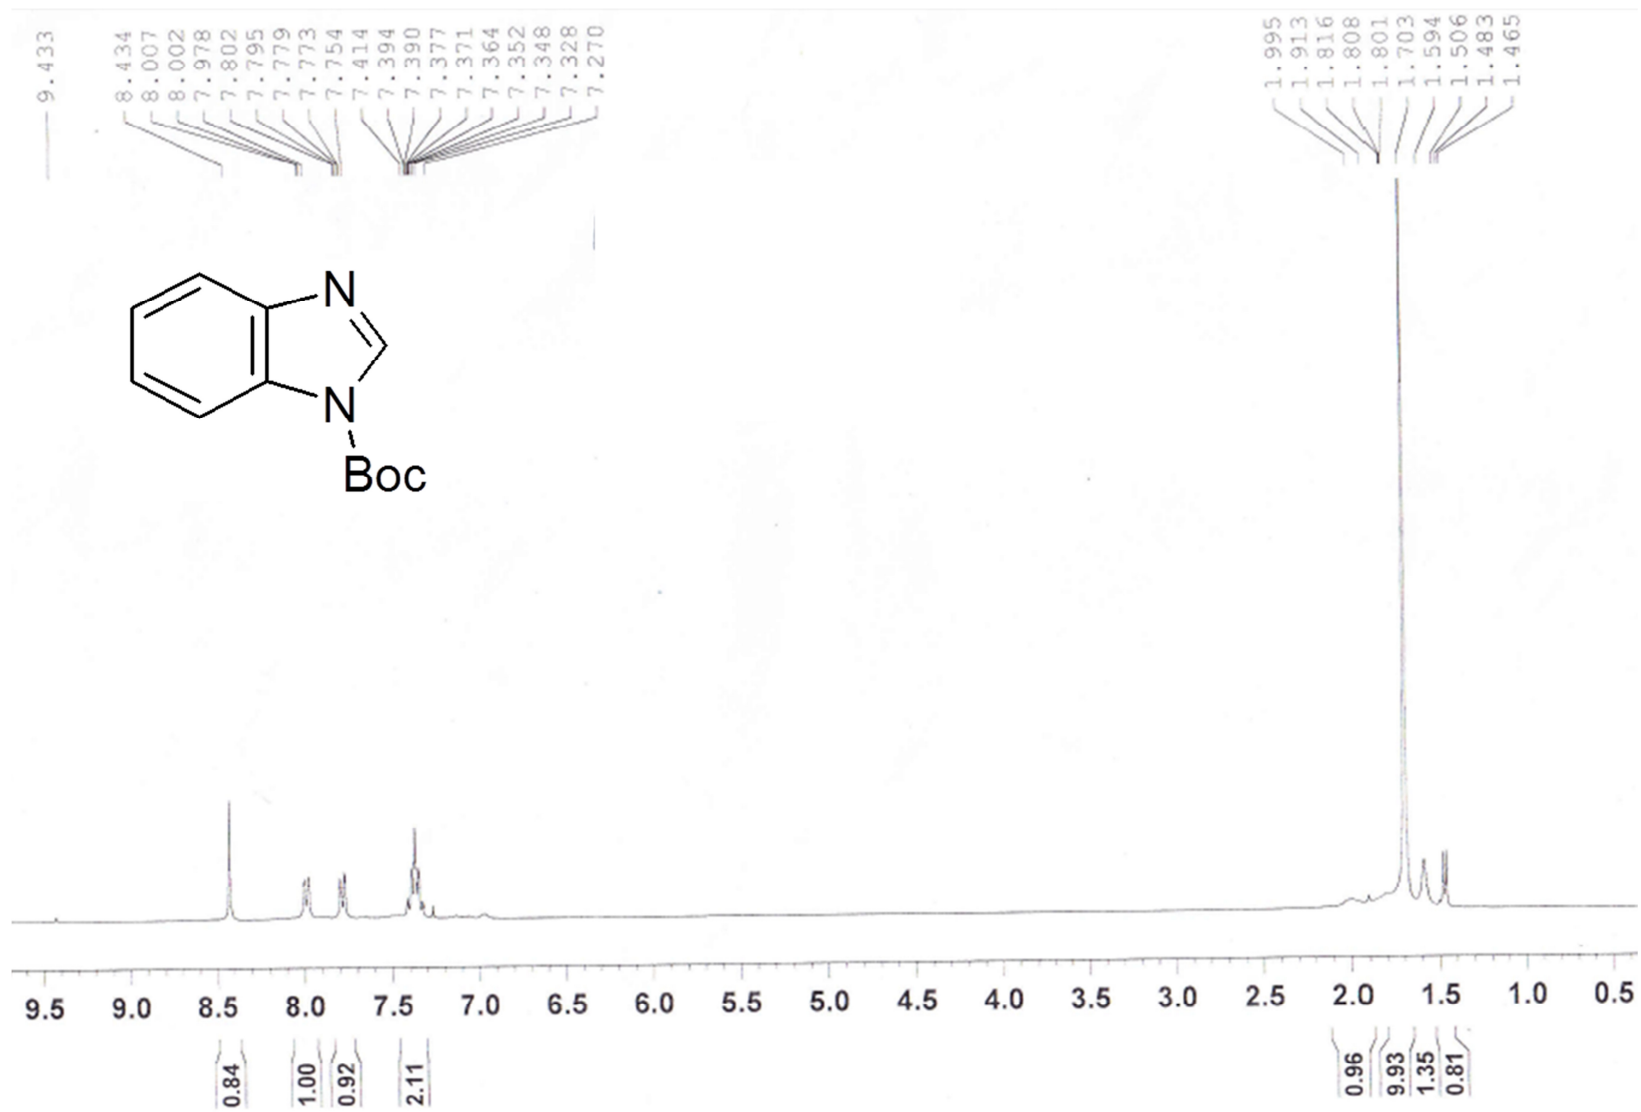

# <sup>1</sup>H NMR spectra of 4i

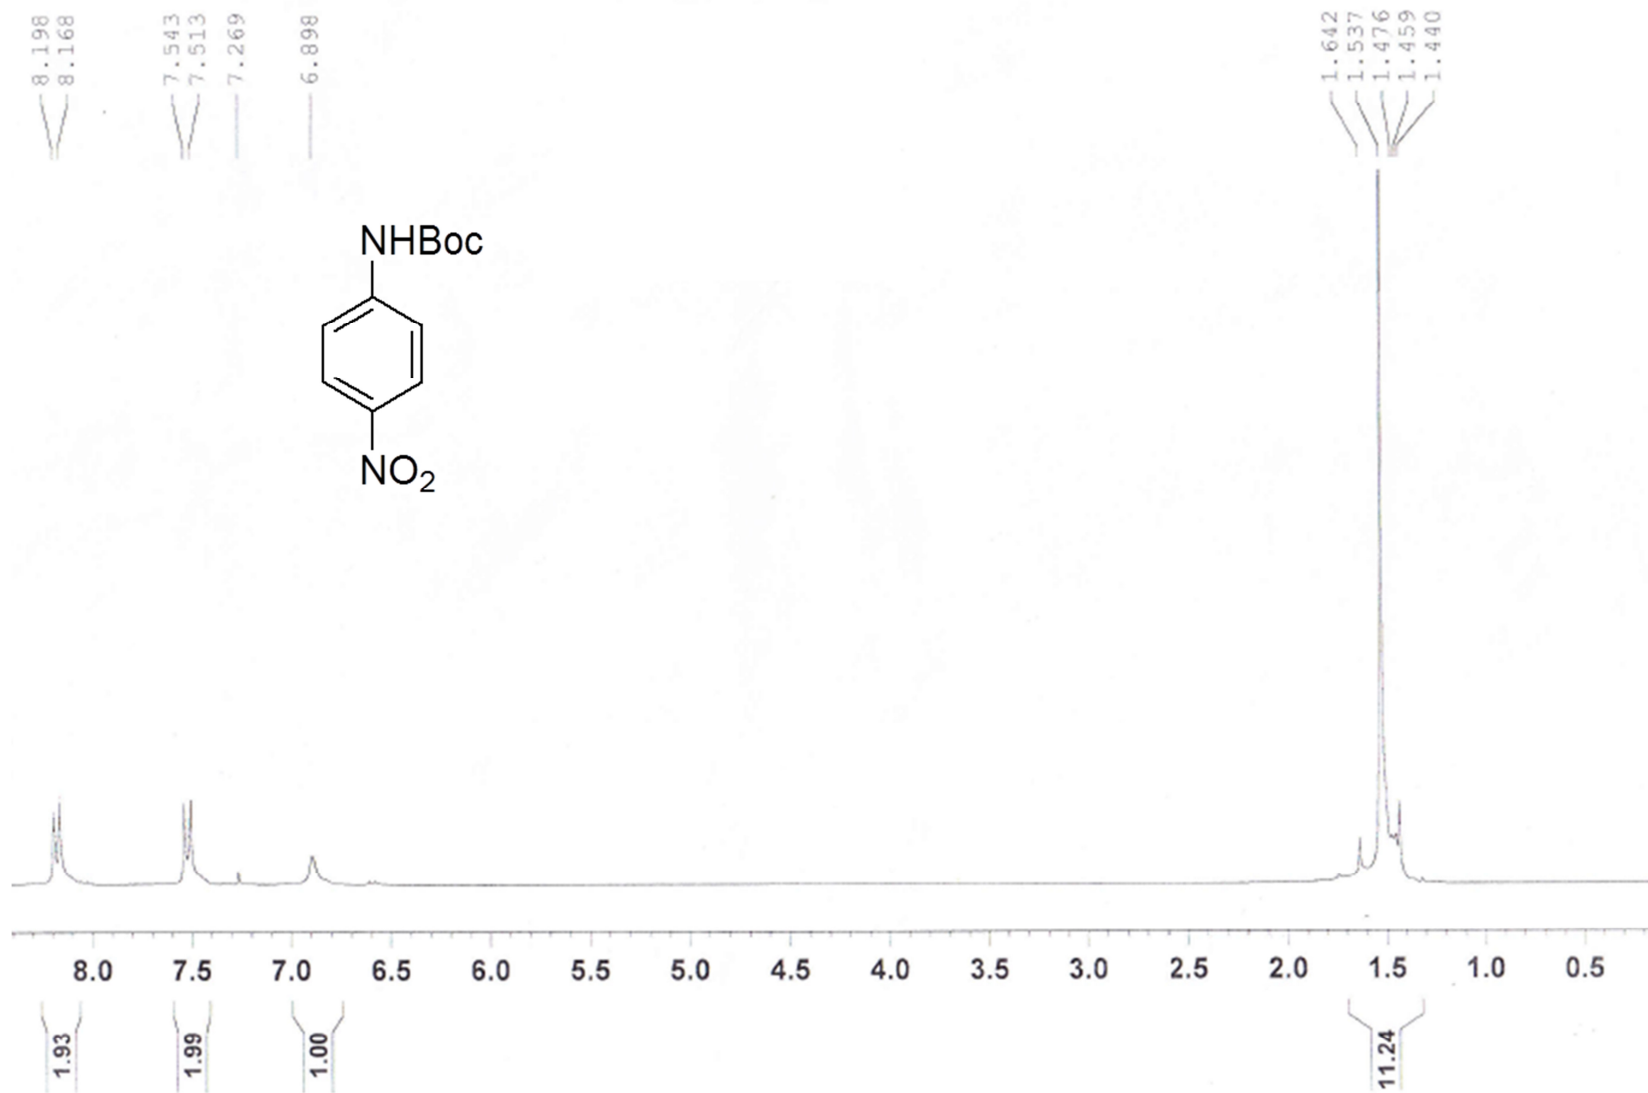



# <sup>1</sup>H NMR spectra of 5f

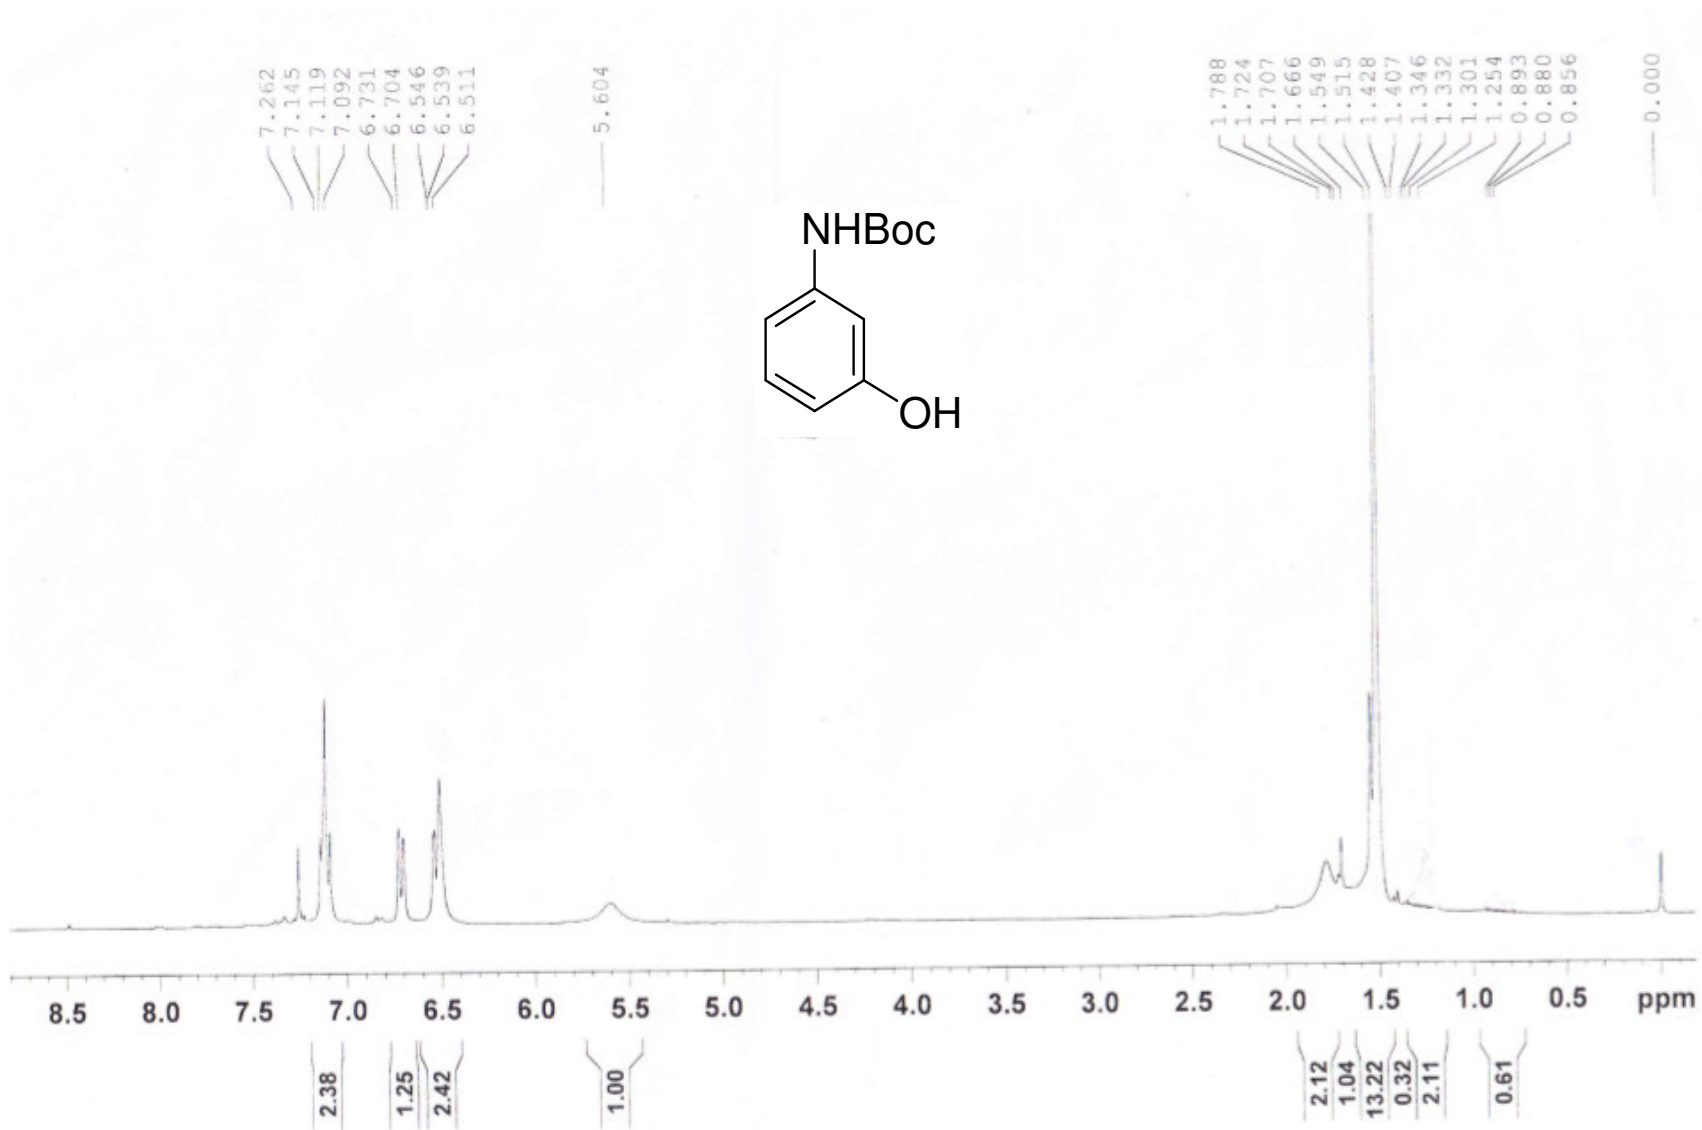

# <sup>1</sup>H NMR spectra of 5g

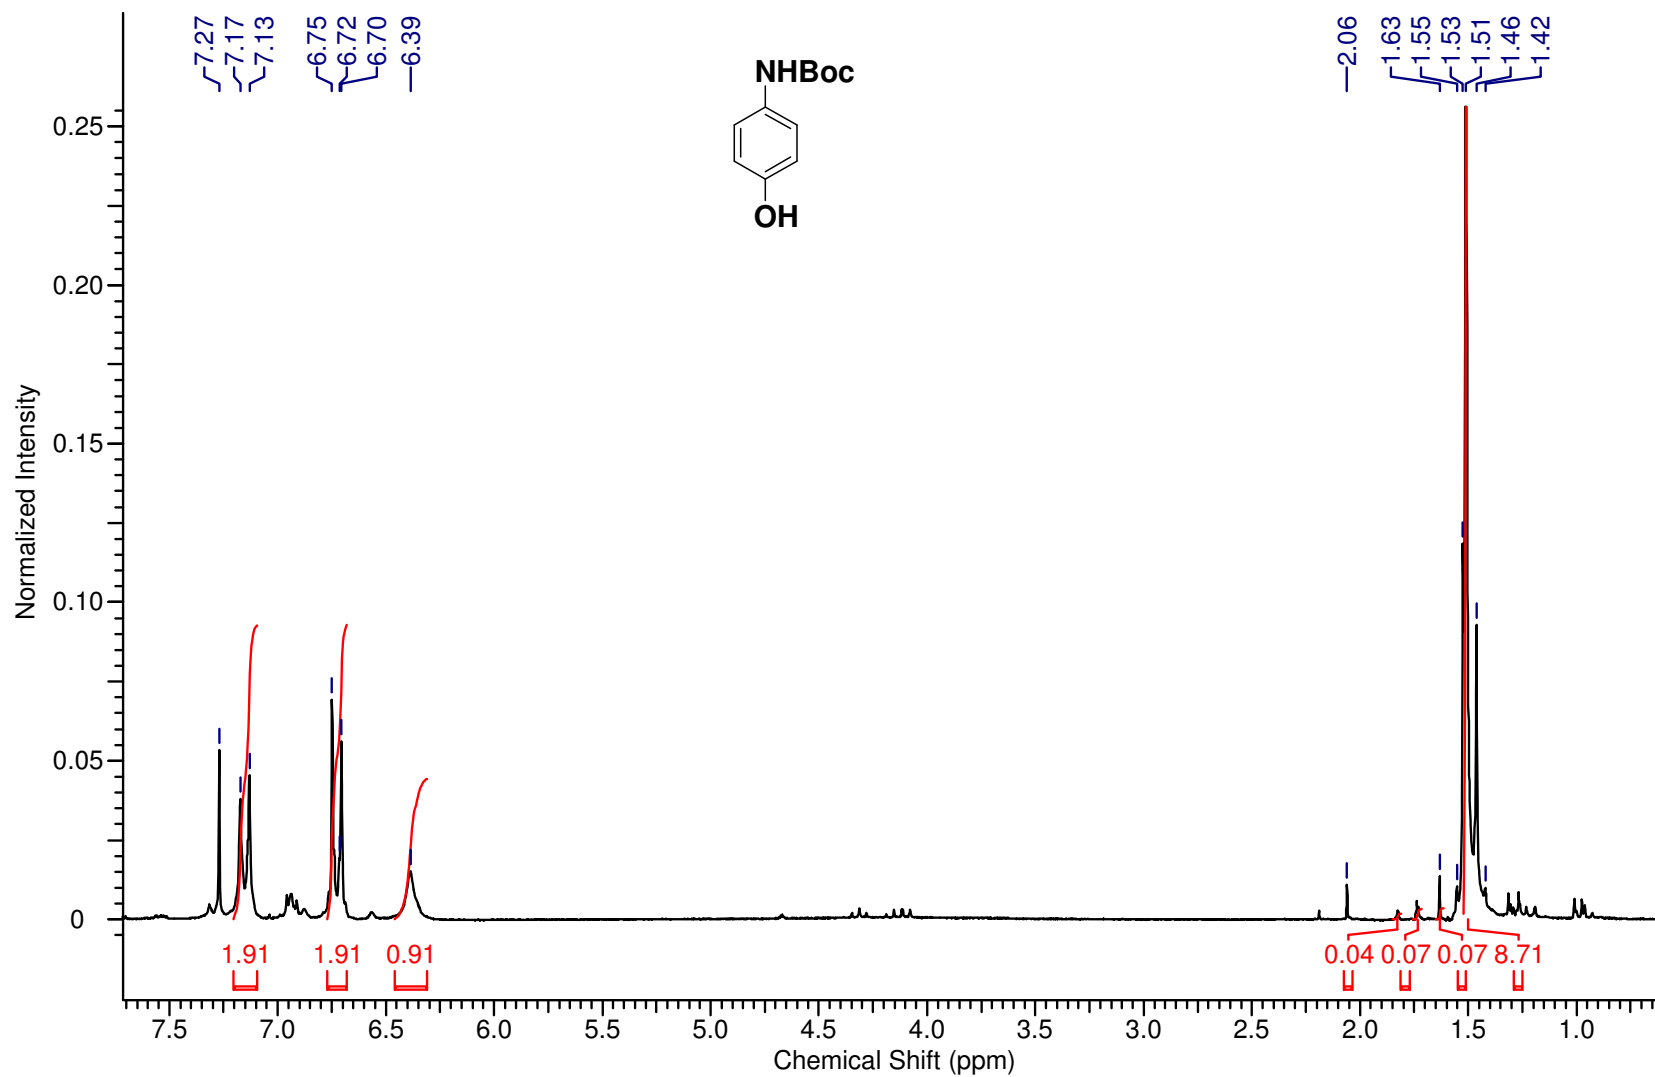

# <sup>1</sup>H NMR spectra of 5h

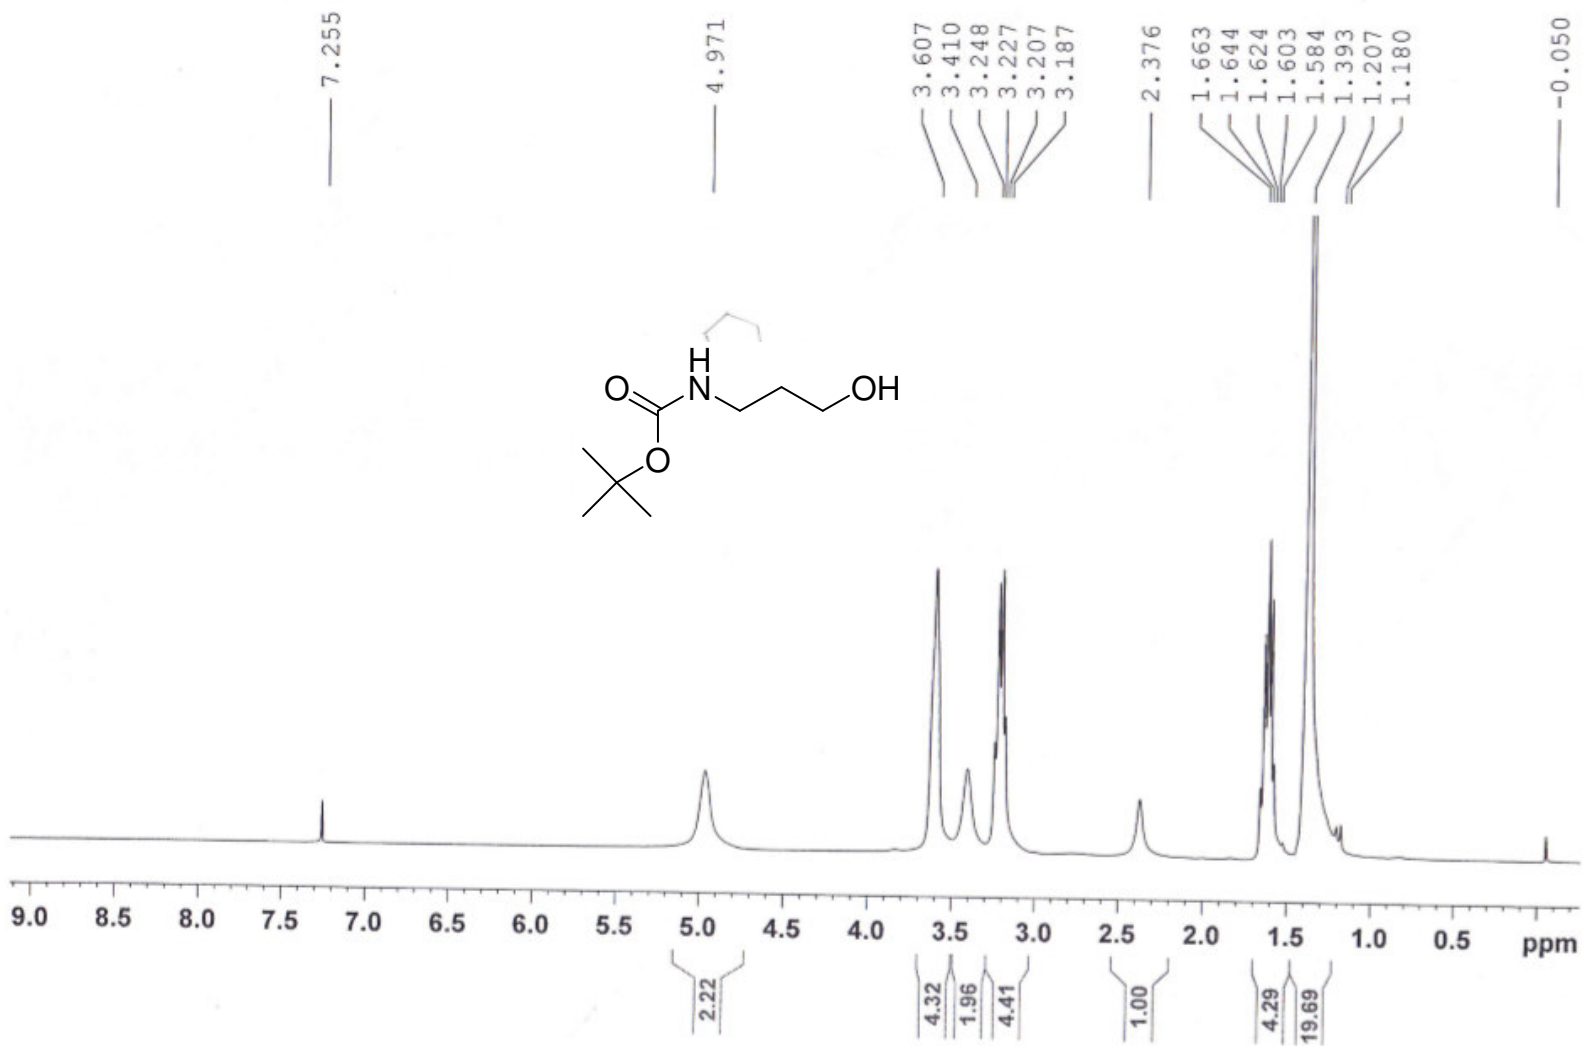

# <sup>13</sup>C NMR spectra of 5h

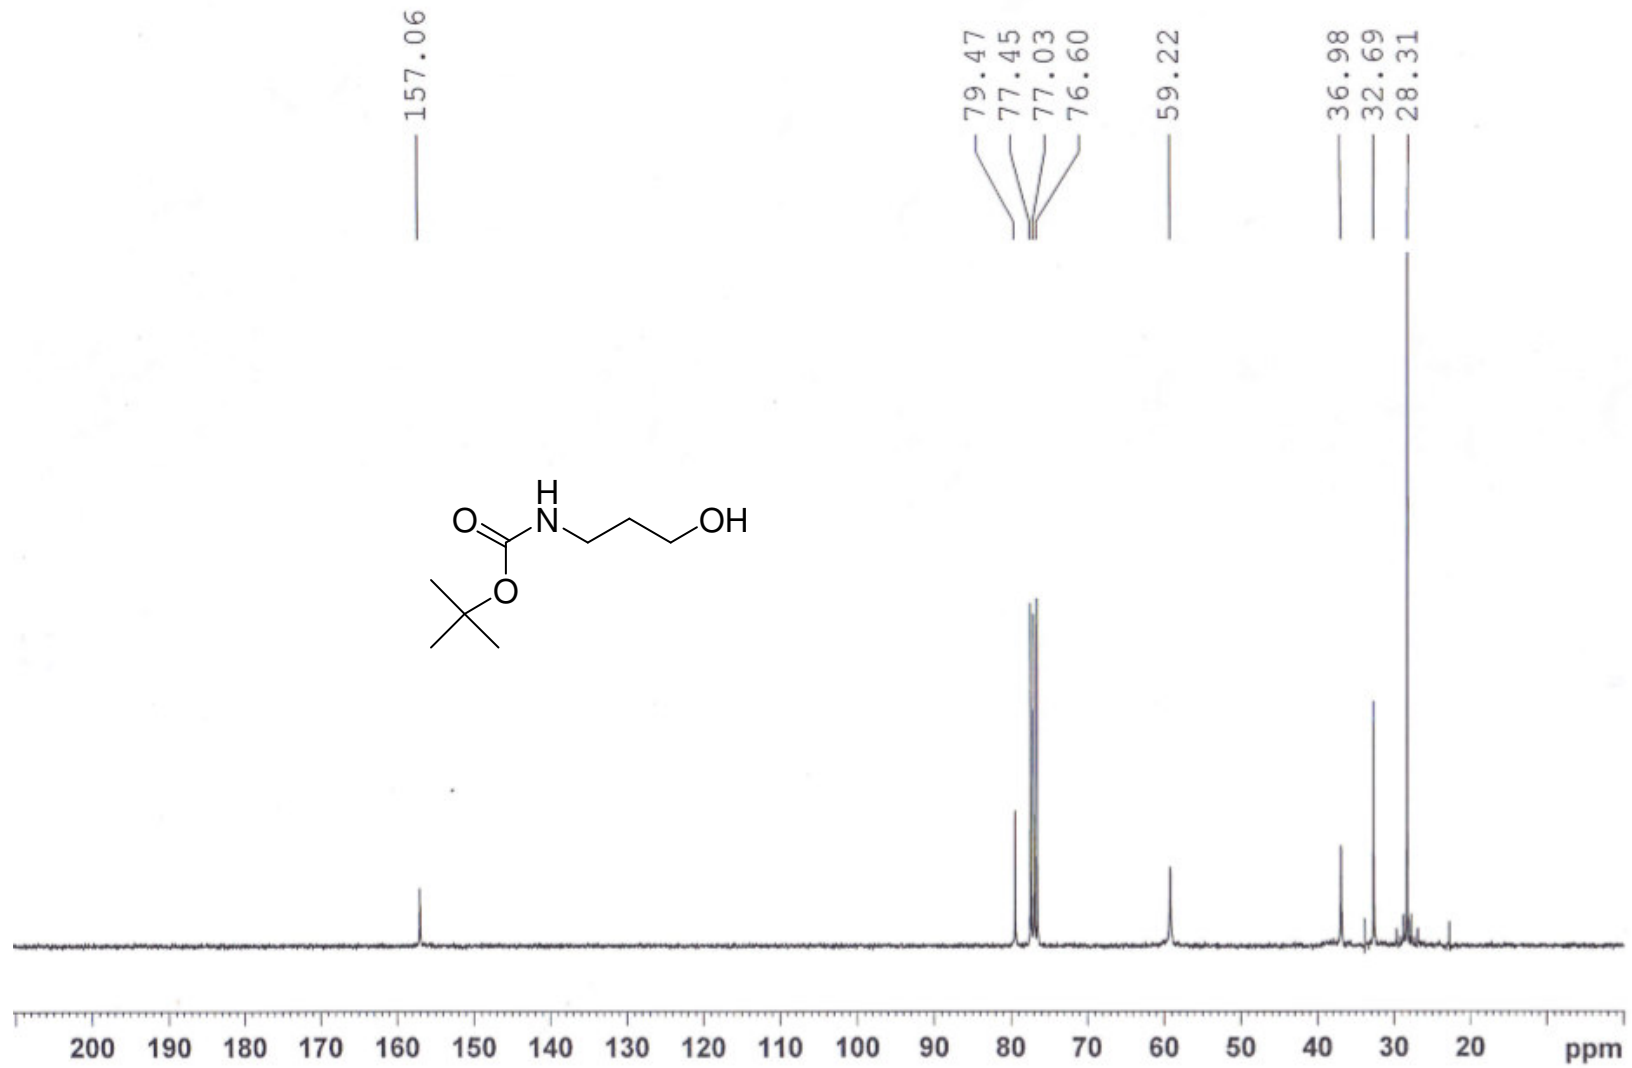

# <sup>1</sup>H NMR spectra of 5i

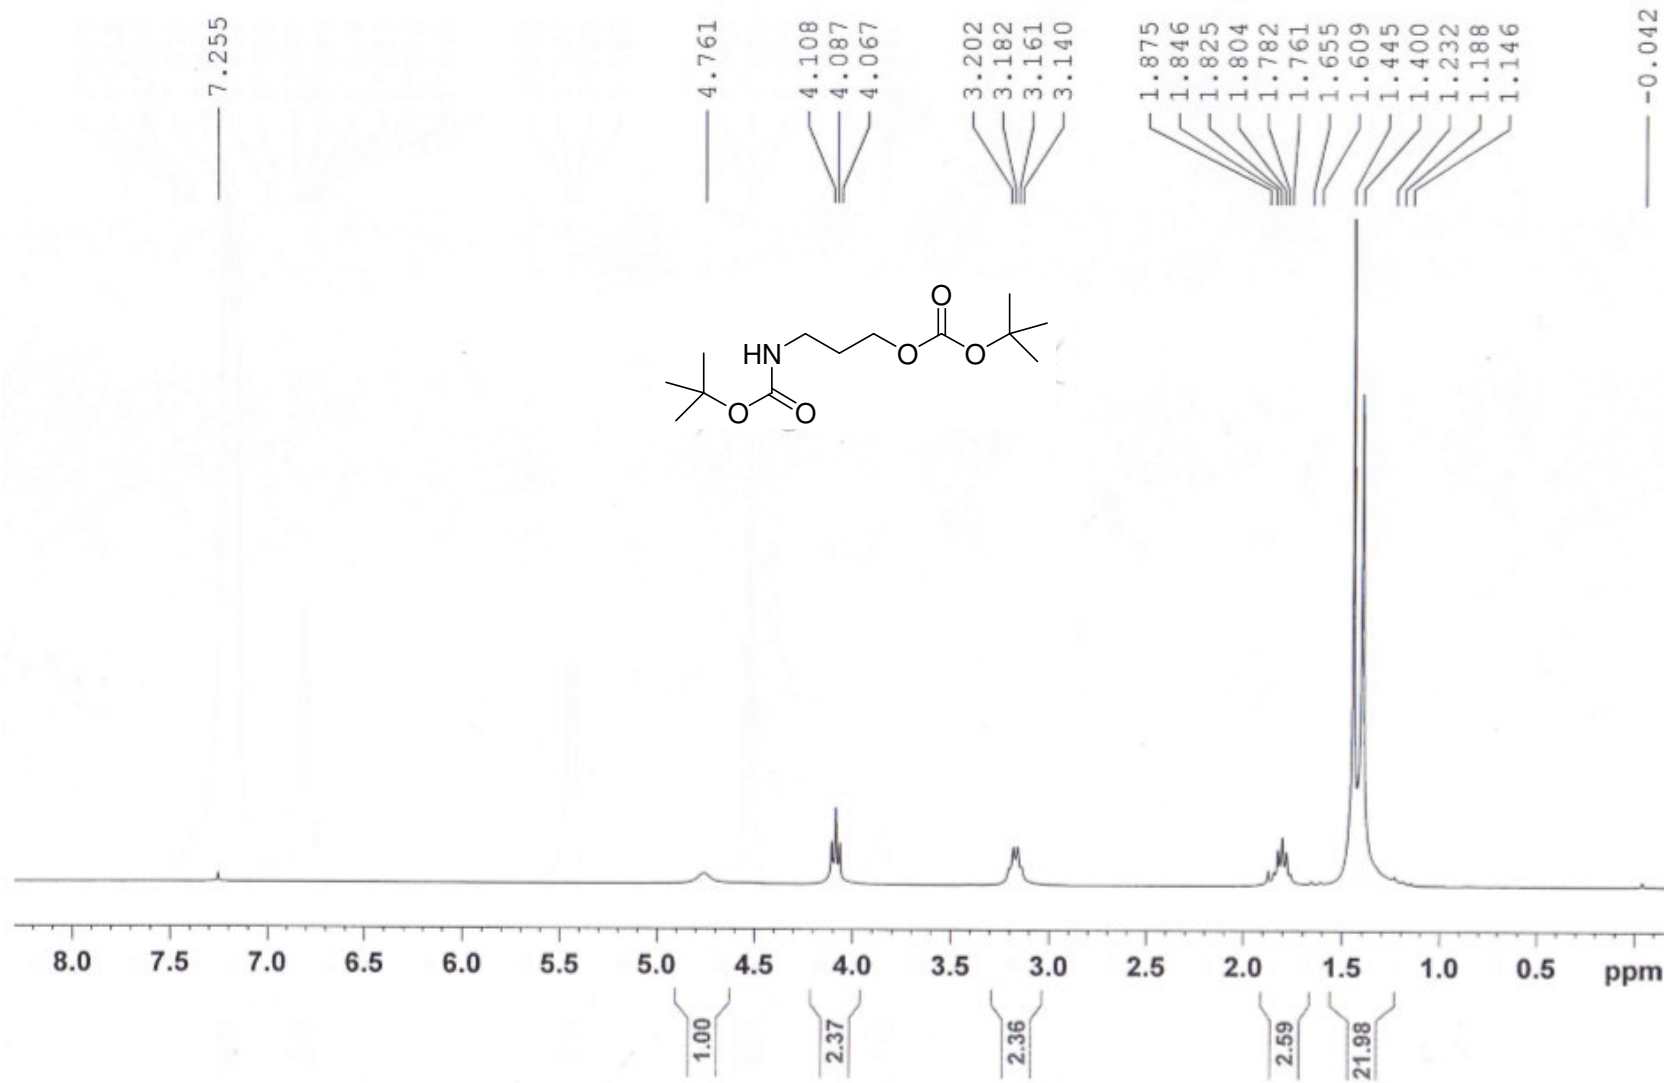

# <sup>13</sup>C NMR spectra of 5i

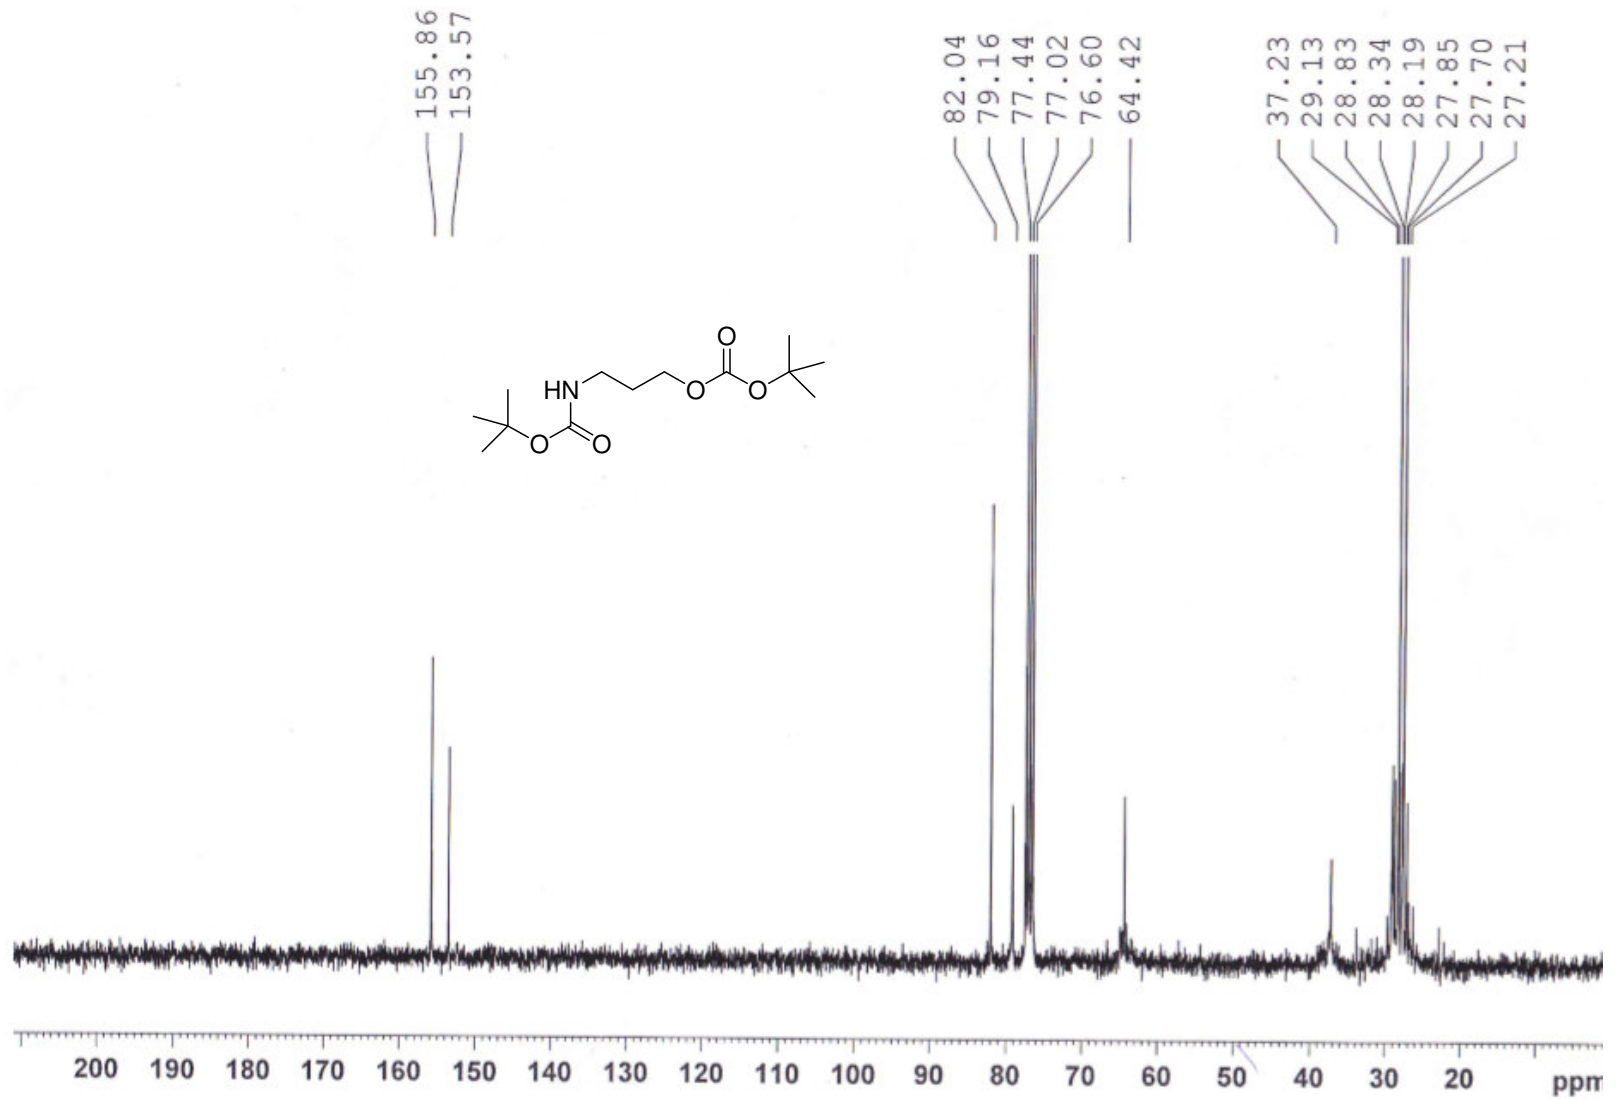

# <sup>1</sup>H NMR spectra of 6a

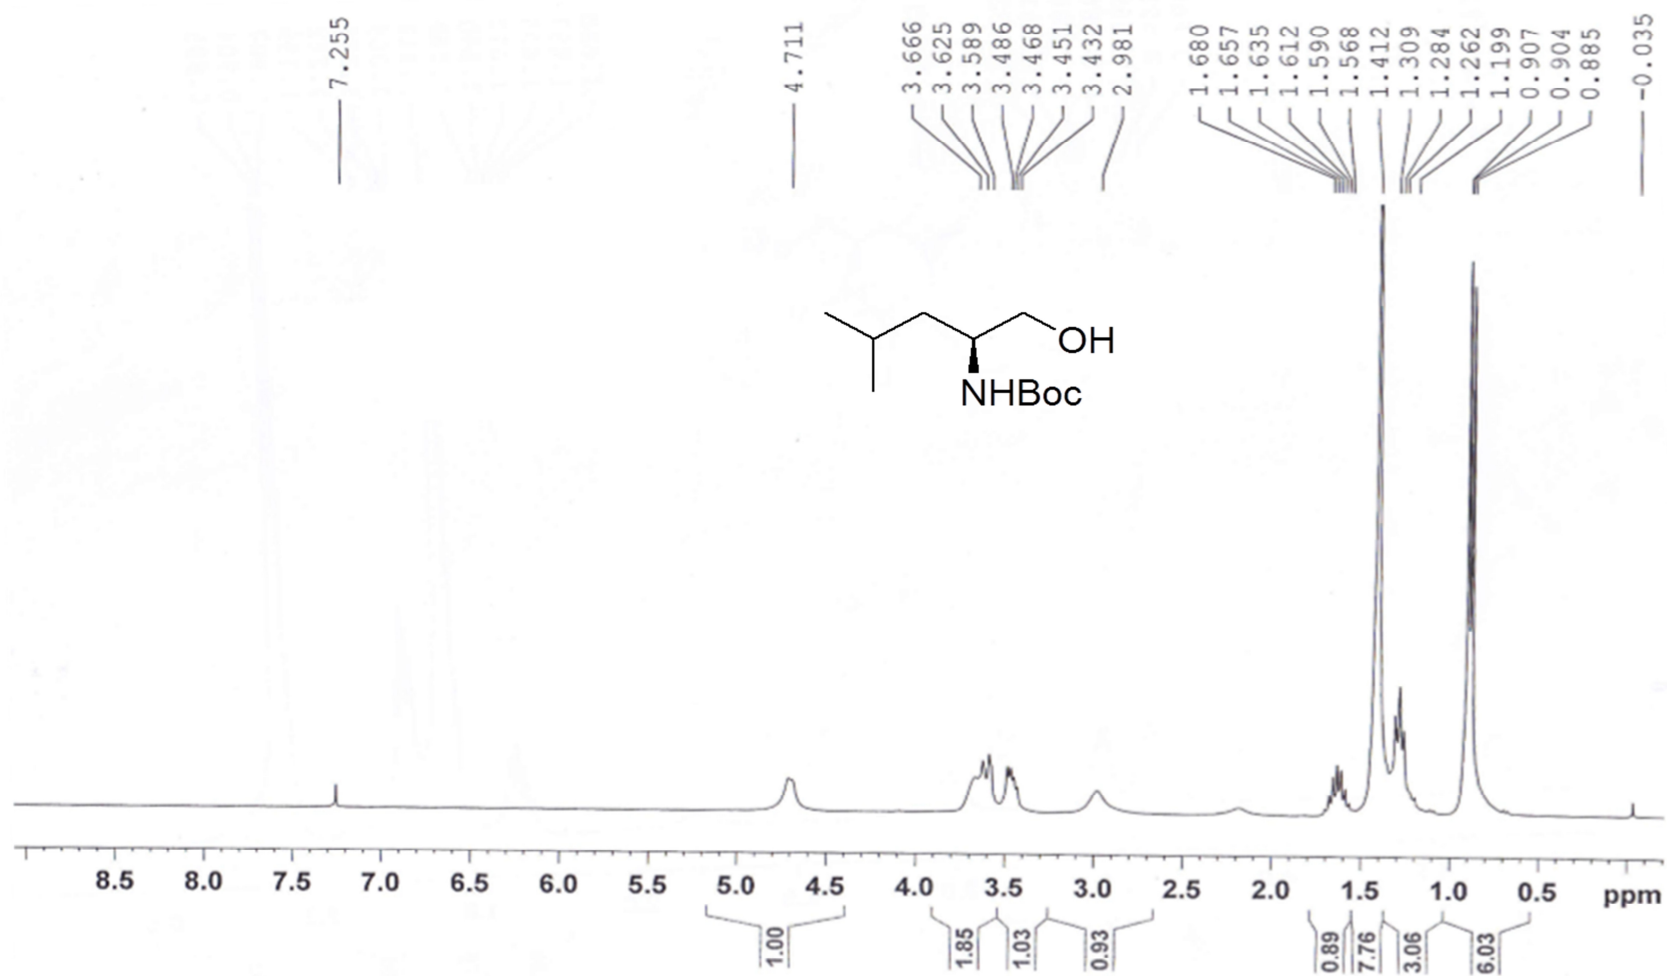

# $^{13}\text{C}$ NMR spectra of 6a

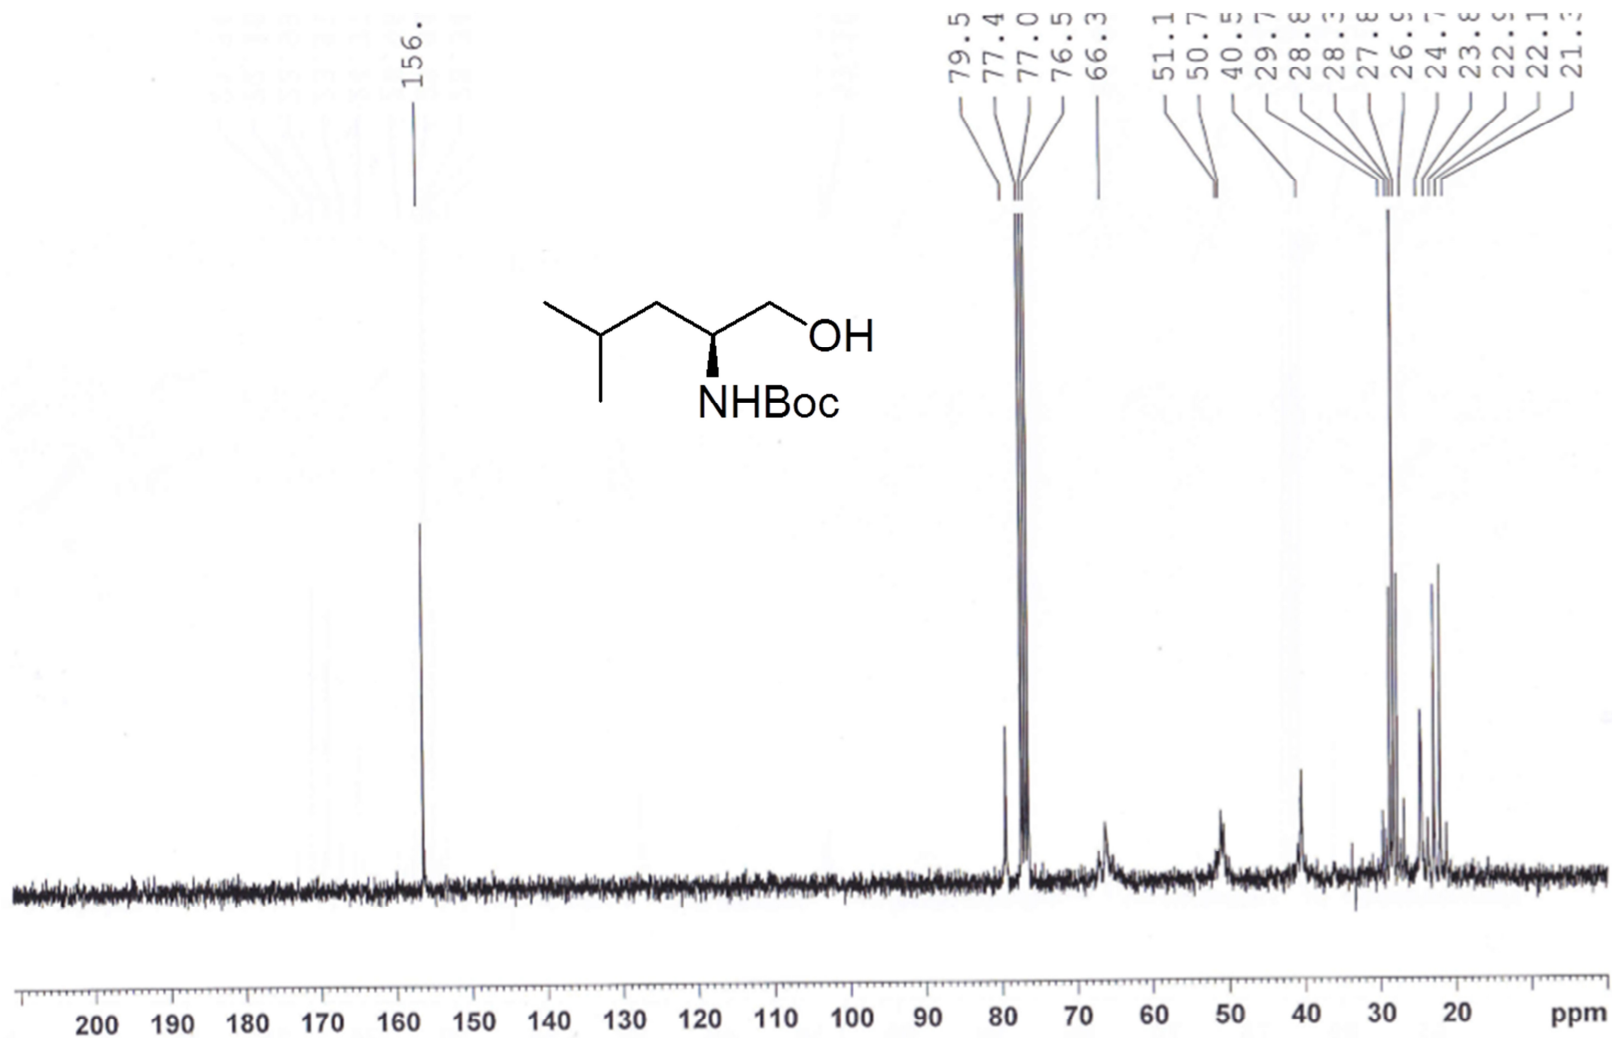



# <sup>1</sup>H NMR spectra of 6b

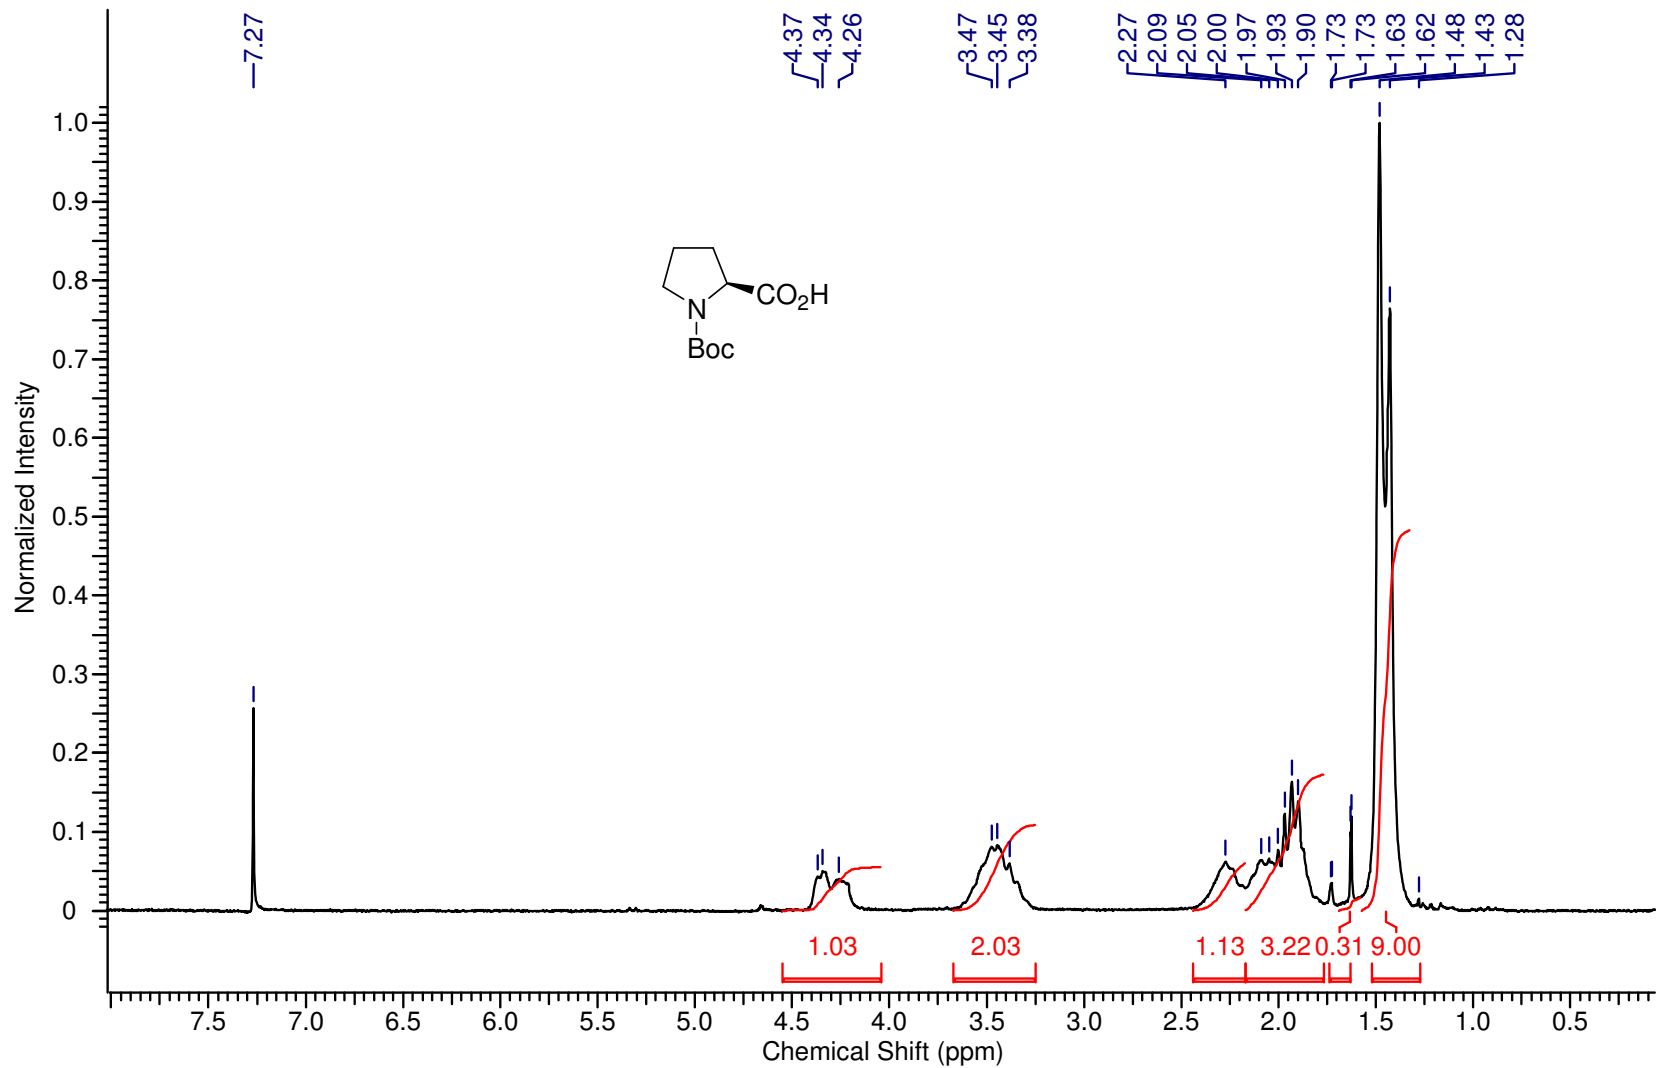

# <sup>1</sup>H NMR spectra of 6g

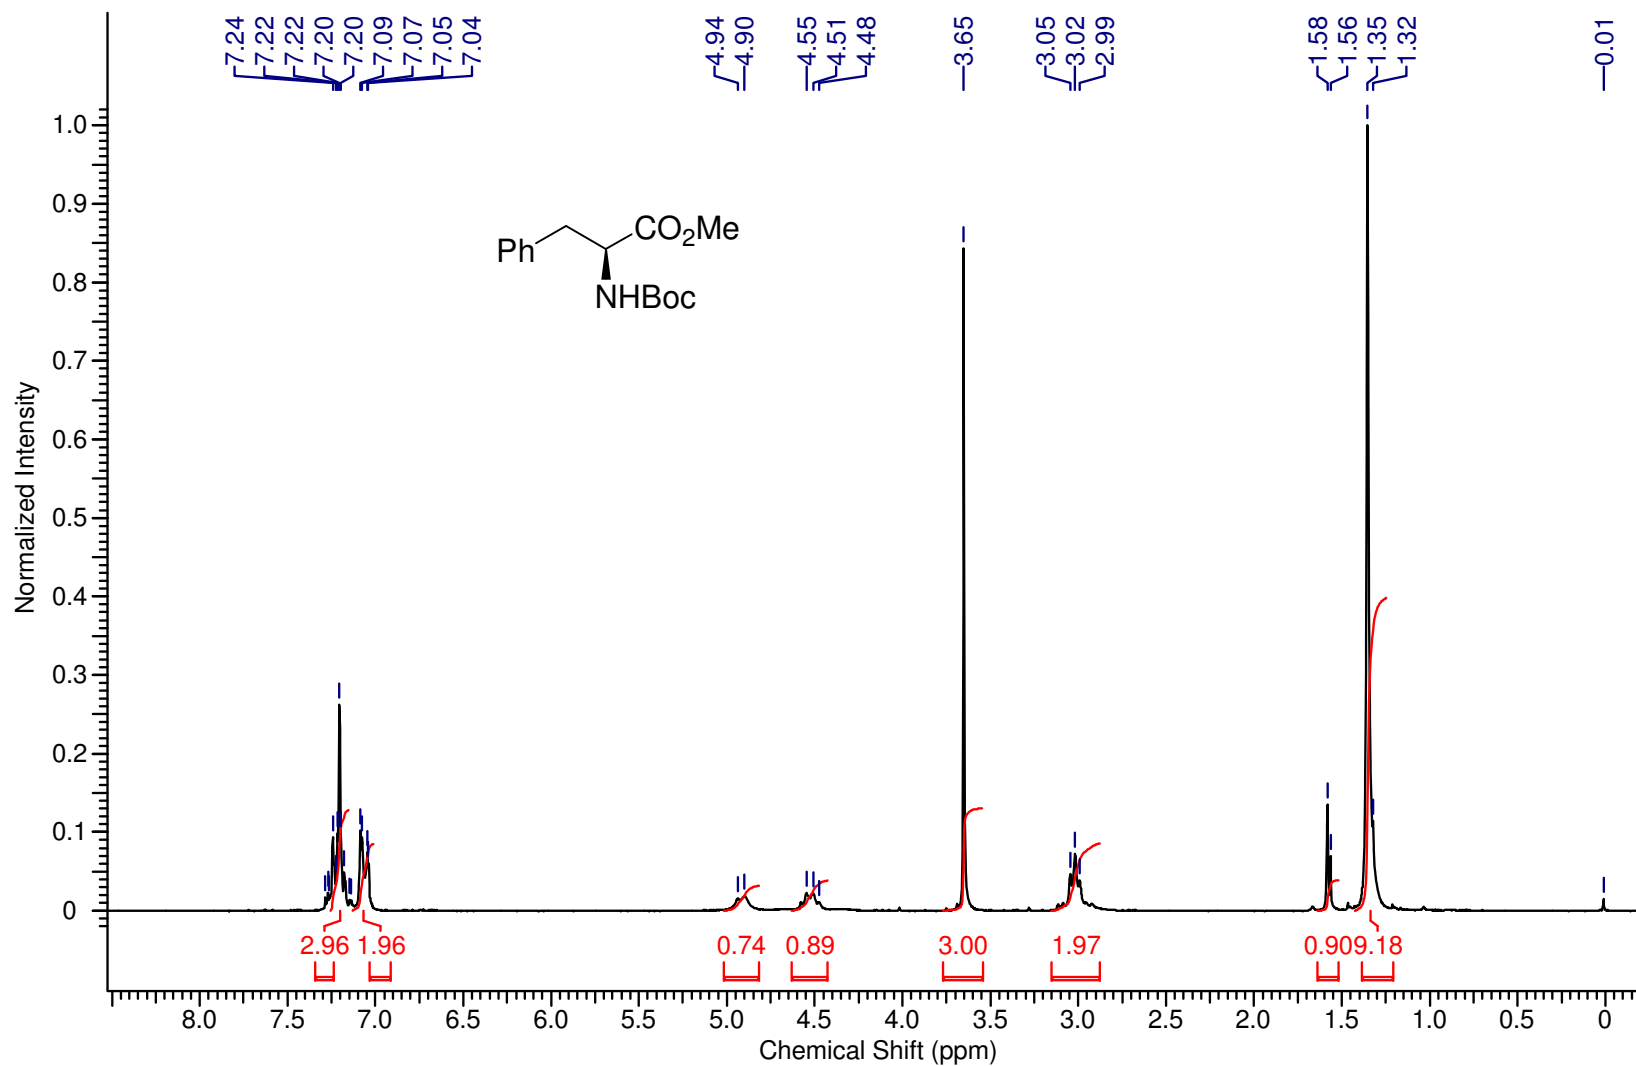

# $^1\text{H}$ NMR spectra of 6i

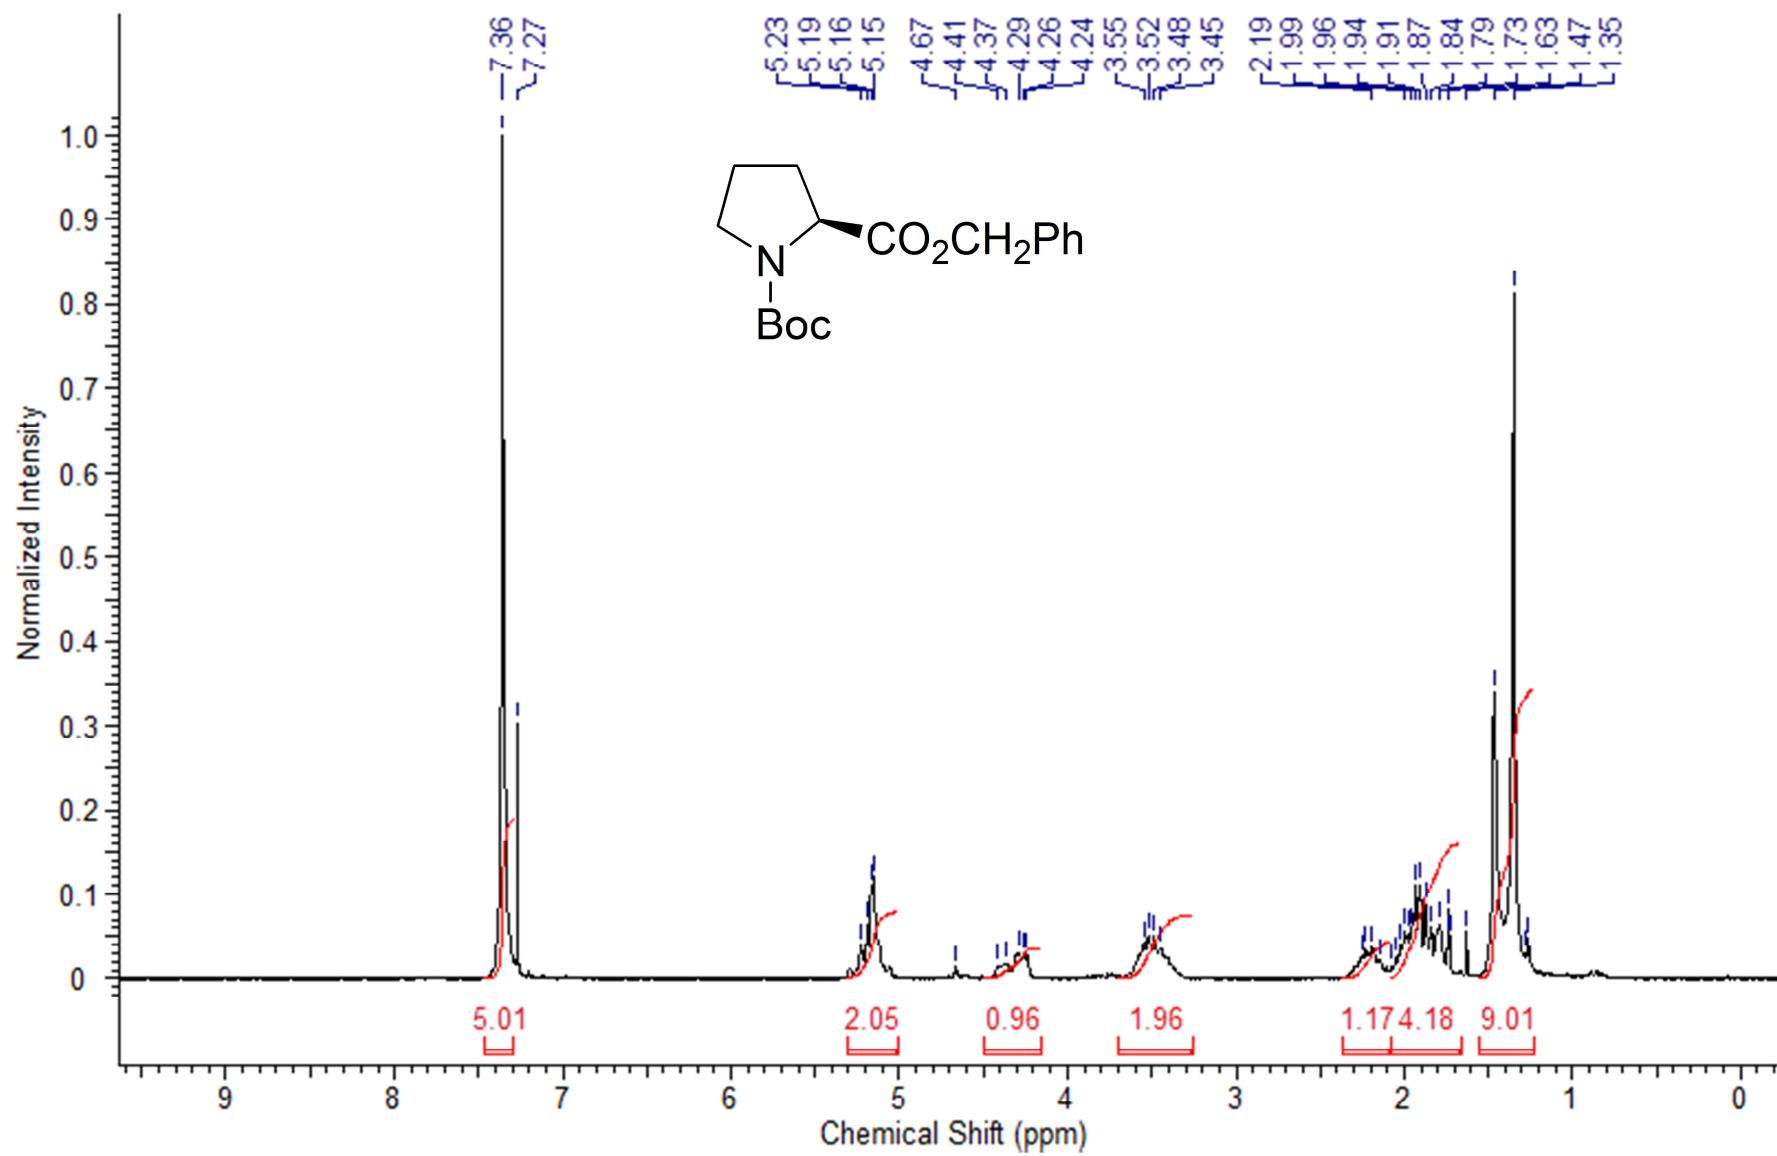

<sup>1</sup>H NMR spectra of 6j

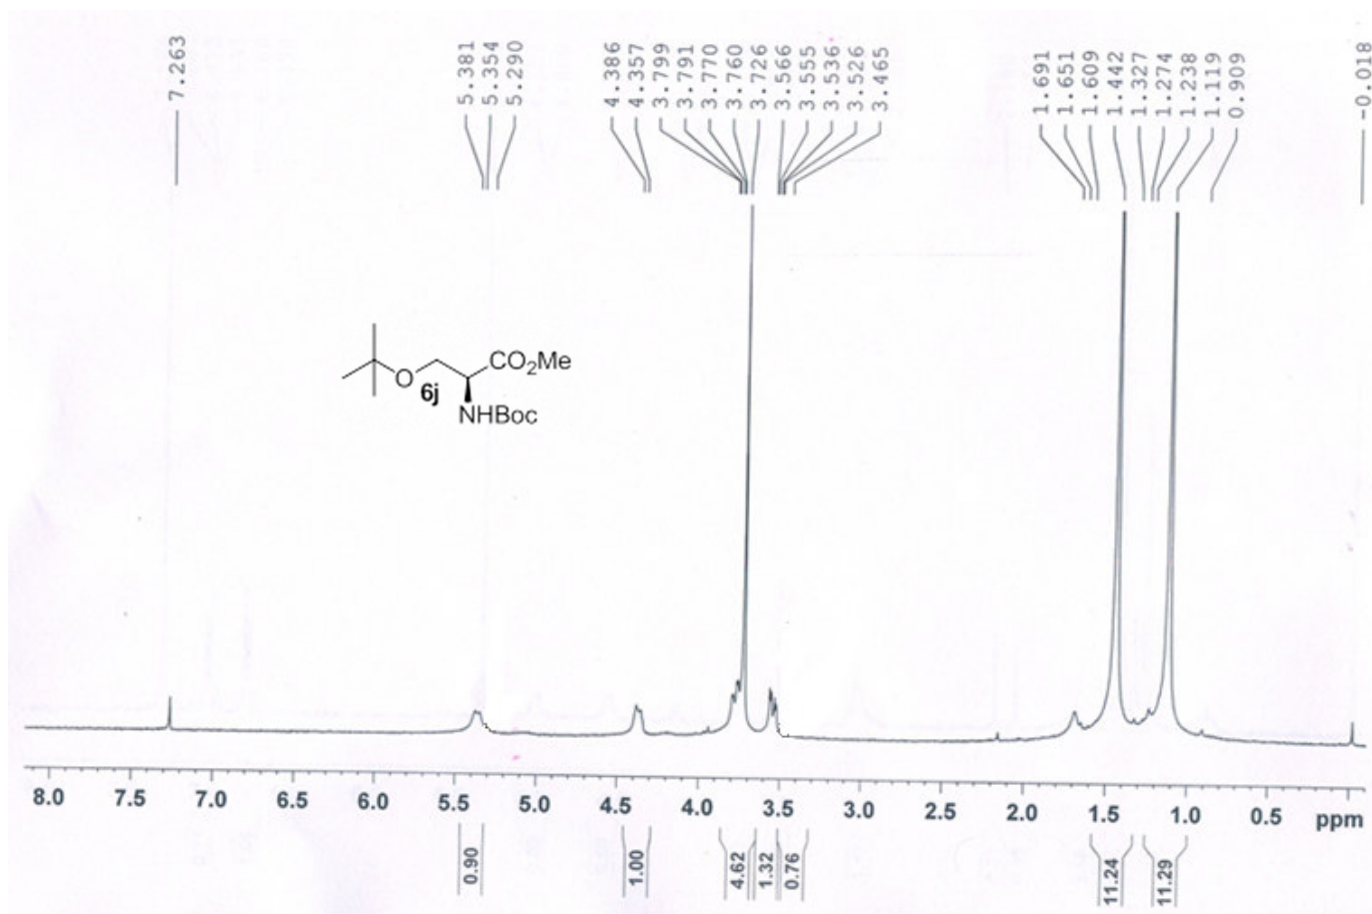

<sup>1</sup>H NMR spectra of 6k

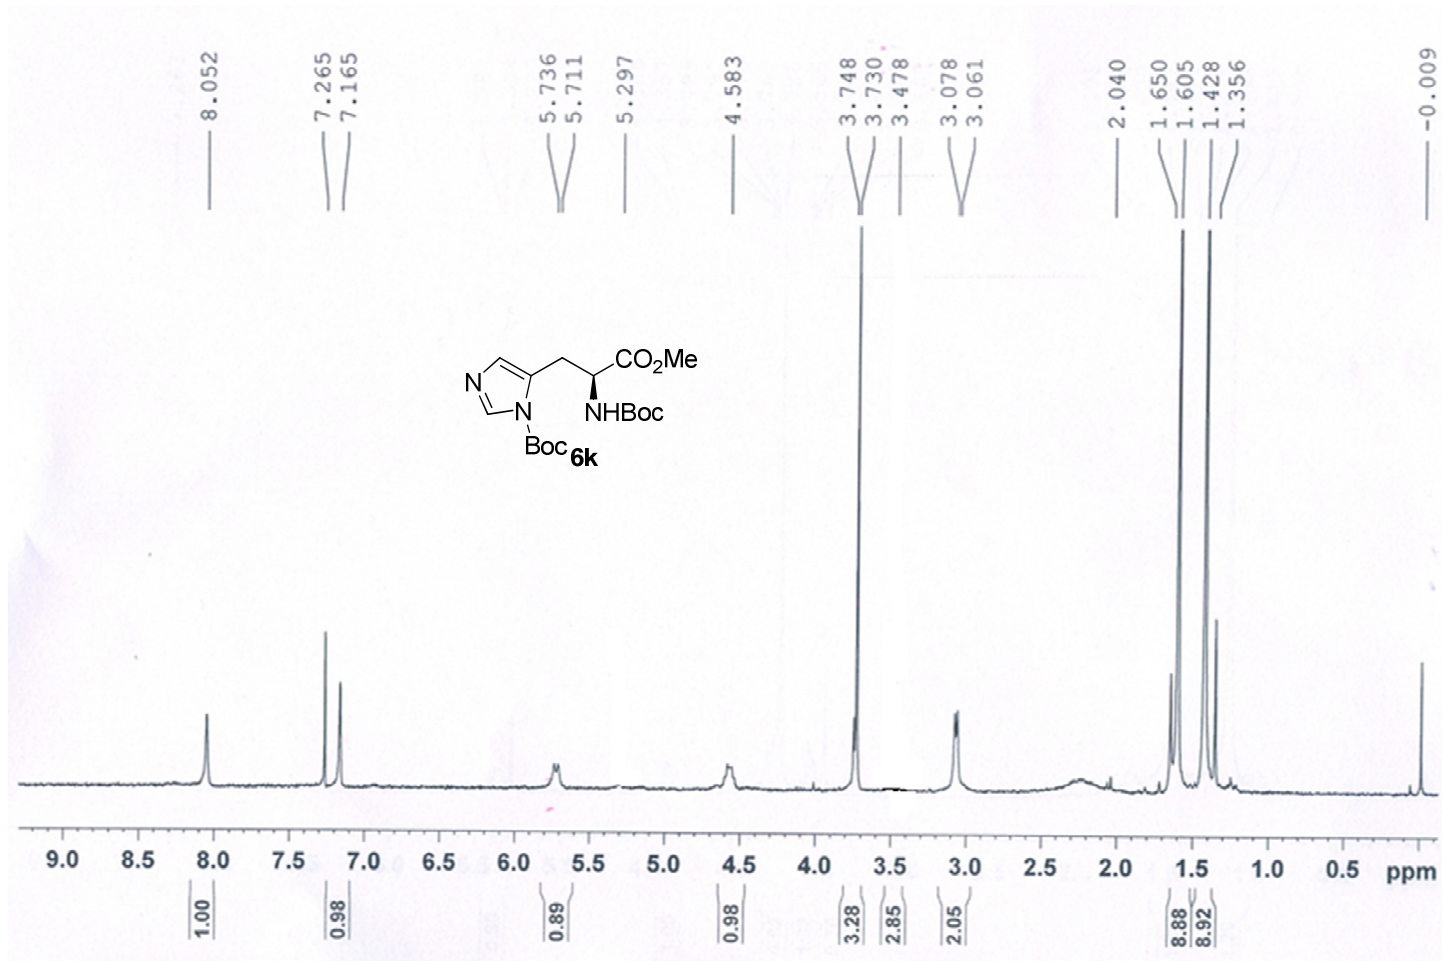

Supplement: c4ra02670e1.pdf [file c4ra02670e1.pdf]
